# Supplementary material for: A Bayesian Inference Framework to Reconstruct Transmission Trees Using Epidemiological and Genetic Data
Source: PLoS Comput Biol. 2012 Nov 15;8(11):e1002768. doi: 10.1371/journal.pcbi.1002768 (PMC3499255; doi:10.1371/journal.pcbi.1002768)
Supplement: Data S1 — FMDV complete genomes for the 2007 dataset. (FASTA) [file pcbi.1002768.s001.fasta]

>IP1b
GGTCTCACCCCTAGTAAGCCAACGACAGTCCCTGCGTTGCACTCCACACTTACGTTGTACACACGCGGGA
CCCGATGGACTTTCGTTCACCCACCTACAGCTGGACTCACGGCACCGCGTGGCCATTTTAGCTGGATTGT
GCGGACGAACACTGCTTGCGCACCTCGCGTGACCAGTTAGTACTCTTACCACTCTCCGCCTACTTGGTCG
TTAGCGCTGTCTTGGGCACTCCTGTTGGGGGCCGTTCGACGCTCCACGGGCTCTCCTGTGTGACATCTAC
GGTGATGGGGCCGTTTCGCGCGTGCTGGTCGTCTGGACTGCTTCGGCTGTCACCCGACGCCCGCCNNNNN
CCCCCCCCCCCCNNNNNTTTACCGTCGTTCCCGACGTAAAAGGGAGGTAACCACAAGCTTGAAACCGTCC
AGCCCGACGAAAAAGGGTGGTAACCACAAGCTTACTGCCGTCTTTCCCGACGTTAAAGGGATGAAACCAC
AAGACTTACCTTCGCTCGGAAGTAAAACGACAAACACGCACAGTTTTGCCCGTTTTCATGAGAAATGGGA
CGTCTGCGCACGAAACGCGCCGTCGCTTGAGGAGGACTTGTACAAACACGATCTATGCAGGTTTCCCCAA
CTGACACAAACCGTGCAACTTGAAACTCCGCCTGGTCTTTCCAGGTCTAGAGGGGTAACATTTTGTACTG
TGTTTGACTCCACGCTCGATCCACTAGCGAGTGTTAGTAGCGGTACTGCTGTCTCGTAGCGGAGCATGTT
GGCCGTGGGAACACCTCCTTGGTAACAAGGACCCACGGGGCCGAAAGCCACGTCCTAACGGACCCAACAT
GTGTGCAACCCCAGCACGGCAGCTTTACTGTGAAACCCACTTCAAGGTGACATTGATACTGGTACTCAAA
CACTGGTGACAGGCTAAGGATGCCCTTCAGGTACCCCGAGGTAACAAGCGACACTCGGGATCTGAGAAGG
GGACTGGGACTTCTTTAAAGTGCCCAGTTTAAAAAGCTTCTACGCCTGAATAGGTGACCGGAGGCCGGCA
CCTTTCCTTTTATAAACACTGAACACATGAATACAACTGACTGTTTTATCGCTTTGGTACAGGCTATCAG
AGAGATTAAAGCACTTTTCCTACCACGCACCACAGGAAAAATGGAACTGACACTGTACAACGGTGAGAAG
AAGACCTTTTACTCCAGGCCCAACAACCACGACAACTGCTGGTTGAACGCCATCCTCCAGTTGTTCAGGT
ACGTTGAAGAACCATTCTTCGACTGGGTCTACAGTTCGCCTGAGAACCTCACGCTTGAAGCCATCAAGCA
GTTGGAGGACCTCACAGGGCTTGAACTGCACGAGGGTGGACCACCTGCTCTCGTGATCTGGAACATCAAG
CACTTGCTCCACACCGGCATTGGCACCGCCTCGCGACCCAGCGAGGTGTGCATGGTGGATGGTACGGACA
TGTGCTTGGCTGATTTCCATGCAGGCATTTTCCTTAAGGGGCAAGAACACGCTGTGTTCGCGTGTGTCAC
CTCCAACGGGTGGTACGCGATTGATGATGAGGACTTCTACCCCTGGACGCCGGACCCATCCGACGTTCTG
GTGTTTGTCCCGTACGATCAAGAACCACTCAACGGGGAATGGAAAGCCAAGGTTCAACGCAAGCTCAAAG
GGGCTGGACAATCCAGTCCAGCGACCGGCTCGCAGAACCAATCTGGCAATACTGGCAGCATAATAAACAA
CTACTACATGCAGCAGTATCAAAACTCCATGGACACACAGCTTGGTGACAACGCAATCAGTGGAGGCTCT
AACGAGGGCTCCACCGACACAACCTCCACCCACACAACCAACACCCAGAACAATGACTGGTTCTCCAAAC
TTGCAAGCTCTGCTTTCAGCGGTCTTTTCGGCGCTCTTCTCGCCGACAAGAAGACAGAGGAGACCACTCT
CCTCGAAGACCGCATCCTCACCACCCGTAACGGCCACACCACGTCGACAACCCAGTCAAGCGTTGGAGTC
ACATACGGGTACGCAACAGCTGAGGATTTTGTGAGCGGACCGAACACTTCTGGTCTCGAGACCAGAGTTG
TGCAGGCAGAACGGTTTTTCAAAACCCACCTCTTCGACTGGGTCACCAGTGACTCATTCGGACGTTGCCA
CCTCCTGGAACTCCCGACCGACCACAAAGGTGTCTACGGCAGCCTGACCGACTCGTATGCATATATGAGG
AACGGCTGGGATGTCGAGGTCACCGCGGTTGGCAACCAGTTCAACGGAGGGTGCCTGCTGGTCGCAATGG
TACCAGAGCTTTGTTCTATCCAAAAGAGGGAACTGTACCAGCTCACACTCTTCCCTCACCAGTTCATCAA
CCCACGCACGAACATGACTGCGCACATTACAGTGCCCTTTGTTGGCGTCAACCGCTACGACCAGTACAAG
GTTCACAAGCCTTGGACCCTTGTGGTTATGGTTGTAGCCCCTCTGACCGTCAACACTGAAGGTGCCCCTC
AGATCAAGGTGTATGCCAACATTGCCCCAACTAACGTGCACGTCGCGGGTGAGTTTCCTTCCAAAGAGGG
AATATTCCCCGTGGCCTGTAGCGACGGCTATGGTGGCCTGGTGACCACGGACCCGAAGACGGCTGACCCC
GTTTATGGGAAAGTGTTCAACCCCCCCCGCAACCAGTTGCCGGGGCGTTTTACCAACCTCCTTGATGTGG
CTGAGGCATGCCCGACGTTTCTGCACTTCGAGGGTGGCGTACCGTACGTGACCACGAAAACAGACTCGGA
CAGGGTGCTTGCTCAGTTTGATATGTCTTTGGCAGCAAAACACATGTCAAACACCTTCCTCGCAGGTCTT
GCGCAGTACTACACACAGTACAGTGGCACCATCAACCTGCACTTCATGTTCACAGGACCCACTGACGCGA
AGGCGCGTTACATGATTGCCTACGCCCCACCGGGCATGGAGCCGCCCAAGACACCTGAGGCGGCCGCGCA
CTGCATTCATGCTGAATGGGACACTGGGTTGAACTCAAAGTTTACTTTTTCCATCCCCTACCTCTCGGCC
GCCGATTACGCGTACACCGCGTCTGACGTGGCCGAGACCACAAATGTGCAGGGATGGGTCTGCTTGTTTC
AAATTACACATGGCAAGGCCGACGGCGACGCTCTGGTCGTACTGGCTAGTGCTGGTAAAGACTTTGAGCT
AAGGCTGCCGGTGGACGCCCGTGCGGAAACCACTTCTGCGGGCGAGTCAGCGGATCCTGTCACCACCACT
GTTGAAAACTACGGTGGCGAAACACAGATCCAGAGGCGCCAACACACGGACGTCTCGTTCATTATGGACA
GATTTGTGAAAGTGACACCGCAAAACCAAATTAACATTTTGGACCTCATGCAGGTCCCATCACACACTTT
GGTGGGAGCGCTCCTACGCGCGTCCACTTACTACTTCTCTGACTTGGAGATAGCAGTAAAACACGAGGGA
GACCTCACCTGGGTTCCAAATGGAGCGCCTGAAAAGGCGTTGGACAACACCACCAACCCAACTGCTTACC
ACAAGGCACCACTCACCCGGCTTGCCCTGCCCTACACTGCGCCCCACCGCGTGTTGGCAACCGTGTACAA
CGGTGAGTGCAGGTACAGCAGAAATGCTGTGCCCAACTTGAGAGGTGACCTTCAAGTGTTGGCTCAAAAG
GTGGCACGGACGCTGCCTACCTCCTTCAACTACGGTGCCATCAAAGCGACCCGGGTCACCGAGTTGCTTT
ACCGGATGAAGAGGGCCGAAACATACTGTCCAAGGCCCTTGCTGGCAATCCACCCAACTGAAGCCAGACA
CAAACAGAAAATTGTGGCACCGGTGAAACAGACTTTGAATTTTGACCTTCTGAAGTTGGCAGGAGACGTT
GAGTCCAACCCTGGGCCCTTCTTCTTCTCCGACGTTAGGTCGAACTTCTCCAAACTGGTGGAAACTATCA
ACCAGATGCAGGAGGACATGTCAACAAAACACGGGCCTGACTTTAACCGGTTAGTGTCCGCATTTGAGGA
ATTGGCCATTGGAGTGAAAGCCATCAGAACCGGTCTCGACGAGGCCAAACCCTGGTACAAGCTTATCAAG
CTCCTAAGCCGCCTGTCGTGCATGGCCGCTGTGGCAGCACGGTCCAAGGACCCAGTCCTTGTGGCCATCA
TGCTGGCCGACACCGGTCTCGAGATTCTGGACAGCACCTTCGTCGTGAAGAAGATCTCCGACTCGCTCTC
CAGTCTCTTTCACGTGCCGGCCCCCGTCTTCAGTTTCGGAGCACCGGTCCTGTTGGCCGGGTTGGTCAAA
GTCGCCTCGAGTTTCTTCCGGTCTACACCCGAAGACCTTGAGAGAGCAGAGAAACAGCTCAAAGCACGTG
ACATCAACGACATCTTCGCCATTCTCAAGAACGGCGAGTGGCTGGTCAAACTGATCCTTGCCATCCGCGA
CTGGATTAAGGCTTGGATCGCCTCAGAAGAGAAGTTTGTCACCATGACAGACTTGGTGCCTGGCATCCTT
GAAAAGCAGCGGGATCTGAACGACCCGAGCAAGTACAAGGAAGCCAAGGAGTGGCTCGACAACGCGCGCC
AAGCGTGTTTGAAGAGCGGGAACGTCCACATTGCCAACCTGTGTAAAGTGGTCGCTCCAGCACCCAGCAA
GTCGAGGCCCGAACCCGTGGTTGTTTGTCTCCGCGGCAAATCTGGCCAGGGCAAGAGCTTCCTTGCAAAC
GTGCTTGCACAGGCAATTTCCGCCCACTTCACCGGCAGAACCGACTCAGTGTGGTACTGCCCACCTGACC
CTGACCACTTCGACGGTTACAACCAGCAAACCGTCGTTGTGATGGATGATTTGGGCCAGAACCCTGACGG
CAAGGACTTCAAATACTTTGCCCAAATGGTCTCGACCACAGGGTTCATCCCGCCCATGGCATCACTCGAG
GACAAAGGTAAACCTTTCAACAGCAAAGTCATCATCGCGACCACCAACTTGTACTCGGGCTTCACCCCGA
GGACTATGGTGTGTCCCGACGCACTGAACCGGAGGTTTCACTTTGACATCGATGTGAGTGCTAAGGATGG
GTACAAAATTAACAACAAATTGGACATTATCAAAGCACTTGAAGACACCCACACCAACCCAGTGGCAATG
TTTCAATACGACTGTGCCCTTCTCAACGGCATGGCCGTTGAAATGAAGAGAATGCAACAAGACATGTTCA
AGCCTCAACCACCCCTCCAGAATGTGTACCAGCTTGTTCAGGAGGTGATTGATCGGGTCGAGCTCCATGA
GAAAGTGTCGAGCCACCCGATCTTCAAGCAGATCTCAATTCCTTCCCAAAAATCTGTGTTGTACTTTCTC
ATTGAGAAGGGCCAACATGAGGCAGCAATTGAATTCTTTGAGGGCATGGTCCACGACTCTATTAAAGAGG
AACTCCAACCCCTCCTCCAACAAACTTCATTTGTGAAACGCGCTTTCAAGCGCCTGAAGGAAAATTTTGA
GATTGTTGCTCTGTGTTTAACACTTTTGGCAAACATTGTGATCATGGTCCGTGAGACTCGCAAGAGGCAG
AAAATGGTGGATGATGCAGTGAATGAGTACATTGAGAAAGCAAACATCACCACAGATGACAAGACTCTTG
ACGAGGCGGAGAAGAGCCCTCTAGAGACCAGCGGCGCCAGCACCGTTGGCTTTAGAGAGAGAACTCTCCC
AGGTCAAAAGGCATGCGATGACGTGAACTCCGAGCCTGCCCAACCTGTTGAGGAGCAACCACAAGCTGAA
GGACCCTACGCCGGACCACTCGAGCGTCAGAAACCTCTGAAAGTGAGAGCCAAGCTCCCACAGCAGGAGG
GGCCTTACGCTGGTCCAATGGAGAGACAGAAACCGCTAAAAGTGAAAGCAAAAGCCCCGGTCGTGAAGGA
AGGACCTTACGAGGGACCGGTGAAGAAGCCTGTCGCTTTGAAAGTGAAAGCTAAGAACCTGATTGTCACT
GAGAGTGGTGCCCCACCGACCGACTTGCAAAAGATGGTCATGGGCAACACAAAGCCTGTTGAGCTCATCC
TCGACGGGAAGACAGTAGCCATTTGCTGCGCTACTGGAGTGTTTGGCACTGCTTACCTCGTGCCTCGTCA
CCTCTTCGCAGAGAAGTATGACAAGATCATGTTGGACGGCAGAGCCATGACAGACAGTGACTACAGAGTG
TTTGAGTTTGAGATCAAAGTAAAAGGACAGGACATGCTCTCAGACGCCGCGCTCATGGTGCTCCACCGTG
GGAACCGCGTGAGGGACATCACGAAGCACTTTCGTGACACAGCAAGAATGAAGAAAGGCACCCCCGTTGT
CGGTGTGATTAACAACGCCGATGTCGGGAGACTGATTTTCTCCGGTGAGGCCCTTACTTACAAGGACATT
GTGGTTTGTATGGACGGAGACACCATGCCCGGCCTCTTTGCCTACAGAGCCGCCACCAAGGCTGGCTACT
GCGGAGGAGCCGTTCTCGCCAAAGACGGAGCTGACACTTTCATCGTCGGCACTCACTCTGCAGGAGGCAA
CGGAGTTGGATACTGCTCATGCGTTTCCAGGTCCATGCTTCTTAAAATGAAGGCACACATTGACCCCGAA
CCACATCACGAGGGGTTGATTGTGGACACCAGAGATGTGGAAGAGCGCGTTCACGTGATGCGCAAAACCA
AGCTTGCACCCACCGTTGCACACGGTGTGTTCAACCCCGAGTTTGGGCCCGCTGCCTTGTCCAACAAGGA
CCCGCGTCTGAACGAGGGTGTTGTCCTCGATGAAGTCATCTTCTCCAAACACAAGGGAGACACAAAGATG
TCTGAGGAGGACAAAGCGCTGTTCCGCCGCTGTGCTGCTGACTACGCGTCACGCCTGCACAGCGTGTTGG
GCACAGCAAATGCCCCATTGAGCATCTACGAGGCAATCAAGGGTGTCGACGGACTCGACGCCATGGAACC
AGATACAGCGCCCGGCCTCCCCTGGGCCCTCCAGGGTAAACGCCGCGGCGCGCTCATCGACTTCGAAAAC
GGCACGGTCGGACCCGAAGTCGAGGCTGCCCTGAAGCTCATGGAGAAGAGAGAATACAAATTTGCTTGTC
AGACCTTCCTGAAGGACGAGATTCGCCCGATGGAGAAAGTACGTGCCGGCAAGACTCGCATTGTCGACGT
CTTGCCCGTTGAGCATATTCTTTACACCAGGATGATGATTGGCAGATTTTGTGCACAGATGCACTCAAAC
AACGGACCGCAAATTGGCTCAGCGGTCGGTTGCAACCCTGATGTTGATTGGCAGAGATTTGGCACACACT
TCGCCCAGTACAGAAACGTGTGGGATGTGGACTATTCGGCCTTTGATGCTAATCACTGCAGTGATGCCAT
GAACATCATGTTTGAGGAGGTGTTTCGCACGGAGTTCGGCTTCCACCCGAATGCCGAGTGGATCCTGAAG
ACTCTTGTGAACACGGAACACGCCTATGAGAACAAACGCATCACTGTTGAAGGCGGAATGCCGTCTGGTT
GTTCCGCAACAAGCATCATCAACACAATTTTGAACAACATCTACGTGCTCTACGCCCTGCGTAGACACTA
TGAGGGAGTTGAGCTGGACACATACACCATGATCTCCTACGGAGACGACATCGTGGTGGCAAGTGATTAT
GACTTGGACTTCGAGGCTCTCAAGCCCCACTTTAAATCCCTTGGTCAAACCATCACTCCAGCTGACAAAA
GCGACAAAGGTTTTGTTCTTGGTCACTCCATTACCGATGTCACTTTCCTCAAAAGACACTTCCACATGGA
CTATGGAACTGGGTTTTACAAACCTGTGATGGCCTCAAAGACCCTTGAGGCTATCCTCTCCTTTGCACGC
CGTGGGACCATACAGGAGAAGTTGATCTCCGTGGCAGGACTCGCCGTCCACTCTGGACCAGACGAGTACC
GGCGTCTCTTTGAGCCTTTCCAAGGTCTCTTTGAGATTCCAAGCTACAGATCACTTTACCTGCGTTGGGT
GAACGCCGTGTGTGGTGACGCATAATCCCTCAGAGGCCACGACAACCGGGCTCTGAGGCGCGCGACACCT
TAGGAGTGAAAGCCTGAAAGGGCTTTTCCCGCTTCCTTAATCAAAAAAAAAAAAAA
>IP1b/2
GGTCTCACCCCTAGTAAGCCAACGACAGTCCCTGCGTTGCACTCCACACTTACGTTGTACACACGCGGGA
CCCGATGGACTTTCGTTCACCCACCTACAGCTGGACTCACGGCACCGCGTGGCCATTTTAGCTGGATTGT
GCGGACGAACACTGCTTGCGCACCTCGCGTGACCAGTTAGTACTCTTACCACTCTCCGCCTACTTGGTCG
TTAGCGCTGTCTTGGGCACTCCTGTTGGGGGCCGTTCGACGCTCCACGGGCTCTCCTGTGTGACATCTAC
GGTGATGGGGCCGTTTCGCGCGTGCTGGTCGTCTGGACTGCTTCGGCTGTCACCCGACGCCCGCCNNNNN
CCCCCCCCCCCCNNNNNTTTACCGTCGTTCCCGACGTAAAAGGGAGGTAACCACAAGCTTGAAACCGTCC
AGCCCGACGAAAAAGGGTGGTAACCACAAGCTTACTGCCGTCTTTCCCGACGTTAAAGGGATGAAACCAC
AAGACTTACCTTCGCTCGGAAGTAAAACGACAAACACGCACAGTTTTGCCCGTTTTCATGAGAAATGGGA
CGTCTGCGCACGAAACGCGCCGTCGCTTGAGGAGGACTTGTACAAACACGATCTATGCAGGTTTCCCCAA
CTGACACAAACCGTGCAACTTGAAACTCCGCCTGGTCTTTCCAGGTCTAGAGGGGTAACATTTTGTACTG
TGTTTGACTCCACGCTCGATCCACTAGCGAGTGTTAGTAGCGGTACTGCTGTCTCGTAGCGGAGCATGTT
GGCCGTGGGAACACCTCCTTGGTAACAAGGACCCACGGGGCCGAAAGCCACGTCCTAACGGACCCAACAT
GTGTGCAACCCCAGCACGGCAGCTTTACTGTGAAACCCACTTCAAGGTGACATTGATACTGGTACTCAAA
CACTGGTGACAGGCTAAGGATGCCCTTCAGGTACCCCGAGGTAACAAGCGACACTCGGGATCTGAGAAGG
GGACTGGGACTTCTTTAAAGTGCCCAGTTTAAAAAGCTTCTACGCCTGAATAGGTGACCGGAGGCCGGCA
CCTTTCCTTTTATAAACACTGAACACATGAATACAACTGACTGTTTTATCGCTTTGGTACAGGCTATCAG
AGAGATTAAAGCACTTTTCCTACCACGCACCACAGGAAAAATGGAACTGACACTGTACAACGGTGAGAAG
AAGACCTTTTACTCCAGGCCCAACAACCACGACAACTGCTGGTTGAACGCCATCCTCCAGTTGTTCAGGT
ACGTTGAAGAACCATTCTTCGACTGGGTCTACAGTTCGCCTGAGAACCTCACGCTTGAAGCCATCAAGCA
GTTGGAGGACCTCACAGGGCTTGAACTGCACGAGGGTGGACCACCTGCTCTCGTGATCTGGAACATCAAG
CACTTGCTCCACACCGGCATTGGCACCGCCTCGCGACCCAGCGAGGTGTGCATGGTGGATGGTACGGACA
TGTGCTTGGCTGATTTCCATGCAGGCATTTTCCTTAAGGGGCAAGAACACGCTGTGTTCGCGTGTGTCAC
CTCCAACGGGTGGTACGCGATTGATGATGAGGACTTCTACCCCTGGACGCCGGACCCATCCGACGTTCTG
GTGTTTGTCCCGTACGATCAAGAACCACTCAACGGGGAATGGAAAGCCAAGGTTCAACGCAAGCTCAAAG
GGGCTGGACAATCCAGTCCAGCGACCGGCTCGCAGAACCAATCTGGCAATACTGGCAGCATAATAAACAA
CTACTACATGCAGCAGTATCAAAACTCCATGGACACACAGCTTGGTGACAACGCAATCAGTGGAGGCTCT
AACGAGGGCTCCACCGACACAACCTCCACCCACACAACCAACACCCAGAACAATGACTGGTTCTCCAAAC
TTGCAAGCTCTGCTTTCAGCGGTCTTTTCGGCGCTCTTCTCGCTGACAAGAAGACAGAGGAGACCACTCT
CCTCGAAGACCGCATCCTCACCACCCGTAACGGCCACACCACGTCGACAACCCAGTCAAGCGTTGGAGTC
ACATACGGGTACGCAACAGCTGAGGATTTTGTGAGCGGACCGAACACTTCTGGTCTCGAGACCAGAGTTG
TGCAGGCAGAACGGTTTTTCAAAACCCACCTCTTCGACTGGGTCACCAGTGACTCATTCGGACGTTGCCA
CCTCCTGGAACTCCCGACCGACCACAAAGGTGTCTACGGCAGCCTGACCGACTCGTATGCATATATGAGG
AACGGCTGGGATGTCGAGGTCACCGCGGTTGGCAACCAGTTCAACGGAGGGTGCCTGCTGGTCGCAATGG
TACCAGAGCTTTGTTCTATCCAAAAGAGGGAACTGTACCAGCTCACACTCTTCCCTCACCAGTTCATCAA
CCCACGCACGAACATGACTGCGCACATTACAGTGCCCTTTGTTGGCGTCAACCGCTACGACCAGTACAAG
GTTCACAAGCCTTGGACCCTTGTGGTTATGGTTGTAGCCCCTCTGACCGTCAACACTGAAGGTGCCCCTC
AGATCAAGGTGTATGCCAACATTGCCCCAACTAACGTGCACGTCGCGGGTGAGTTTCCTTCCAAAGAGGG
AATATTCCCCGTGGCCTGTAGCGACGGCTATGGTGGCCTGGTGACCACGGACCCGAAGACGGCTGACCCC
GTTTATGGGAAAGTGTTCAACCCCCCCCGCAACCAGTTGCCGGGGCGTTTTACCAACCTCCTTGATGTGG
CTGAGGCATGCCCGACGTTTCTGCACTTCGAGGGTGGCGTACCGTACGTGACCACGAAAACAGACTCGGA
CAGGGTGCTTGCTCAGTTTGATATGTCTTTGGCAGCAAAACACATGTCAAACACCTTCCTCGCAGGTCTT
GCGCAGTACTACACACAGTACAGTGGCACCATCAACCTGCACTTCATGTTCACAGGACCCACTGACGCGA
AGGCGCGTTACATGATTGCCTACGCCCCACCGGGCATGGAGCCGCCCAAGACACCTGAGGCGGCCGCGCA
CTGCATTCATGCTGAATGGGACACTGGGTTGAACTCAAAGTTTACTTTTTCCATCCCCTACCTCTCGGCC
GCCGATTACGCGTACACCGCGTCTGACGTGGCCGAGACCACAAATGTGCAGGGATGGGTCTGCTTGTTTC
AAATTACACATGGCAAGGCCGACGGCGACGCTCTGGTCGTACTGGCTAGTGCTGGTAAAGACTTTGAGCT
AAGGCTGCCGGTGGACGCCCGTGCGGAAACCACTTCTGCGGGCGAGTCAGCGGATCCTGTCACCACCACT
GTTGAAAACTACGGTGGCGAAACACAGATCCAGAGGCGCCAACACACGGACGTCTCGTTCATTATGGACA
GATTTGTGAAAGTGACACCGCAAAACCAAATTAACATTTTGGACCTCATGCAGGTCCCATCACACACTTT
GGTGGGAGCGCTCCTACGCGCGTCCACTTACTACTTCTCTGACTTGGAGATAGCAGTAAAACACGAGGGA
GACCTCACCTGGGTTCCAAATGGAGCGCCTGAAAAGGCGTTGGACAACACCACCAACCCAACTGCTTACC
ACAAGGCACCACTCACCCGGCTTGCCCTGCCCTACACTGCGCCCCACCGCGTGTTGGCAACCGTGTACAA
CGGTGAGTGCAGGTACAGCAGAAATGCTGTGCCCAACTTGAGAGGTGACCTTCAAGTGTTGGCTCAAAAG
GTGGCACGGACGCTGCCTACCTCCTTCAACTACGGTGCCATCAAAGCGACCCGGGTCACCGAGTTGCTTT
ACCGGATGAAGAGGGCCGAAACATACTGTCCAAGGCCCTTGCTGGCAATCCACCCAACTGAAGCCAGACA
CAAACAGAAAATTGTGGCACCGGTGAAACAGACTTTGAATTTTGACCTTCTGAAGTTGGCAGGAGACGTT
GAGTCCAACCCTGGGCCCTTCTTCTTCTCCGACGTTAGGTCGAACTTCTCCAAACTGGTGGAAACTATCA
ACCAGATGCAGGAGGACATGTCAACAAAACACGGGCCTGACTTTAACCGGTTAGTGTCCGCATTTGAGGA
ATTGGCCATTGGAGTGAAAGCCATCAGAACCGGTCTCGACGAGGCCAAACCCTGGTACAAGCTTATCAAG
CTCCTAAGCCGCCTGTCGTGCATGGCCGCTGTGGCAGCACGGTCCAAGGACCCAGTCCTTGTGGCCATCA
TGCTGGCCGACACCGGTCTCGAGATTCTGGACAGCACCTTCGTCGTGAAGAAGATCTCCGACTCGCTCTC
CAGTCTCTTTCACGTGCCGGCCCCCGTCTTCAGTTTCGGAGCACCGGTCCTGTTGGCCGGGTTGGTCAAA
GTCGCCTCGAGTTTCTTCCGGTCTACACCCGAAGACCTTGAGAGAGCAGAGAAACAGCTCAAAGCACGTG
ACATCAACGACATCTTCGCCATTCTCAAGAACGGCGAGTGGCTGGTCAAACTGATCCTTGCCATCCGCGA
CTGGATTAAGGCTTGGATCGCCTCAGAAGAGAAGTTTGTCACCATGACAGACTTGGTGCCTGGCATCCTT
GAAAAGCAGCGGGATCTGAACGACCCGAGCAAGTACAAGGAAGCCAAGGAGTGGCTCGACAACGCGCGCC
AAGCGTGTTTGAAGAGCGGGAACGTCCACATTGCCAACCTGTGTAAAGTGGTCGCTCCAGCACCCAGCAA
GTCGAGGCCCGAACCCGTGGTTGTTTGTCTCCGCGGCAAATCTGGCCAGGGCAAGAGCTTCCTTGCAAAC
GTGCTTGCACAGGCAATTTCCGCCCACTTCACCGGCAGAACCGACTCAGTGTGGTACTGCCCACCTGACC
CTGACCACTTCGACGGTTACAACCAGCAAACCGTCGTTGTGATGGATGATTTGGGCCAGAACCCTGACGG
CAAGGACTTCAAATACTTTGCCCAAATGGTCTCGACCACAGGGTTCATCCCGCCCATGGCATCACTCGAG
GACAAAGGTAAACCTTTCAACAGCAAAGTCATCATCGCGACCACCAACTTGTACTCGGGCTTCACCCCGA
GGACTATGGTGTGTCCCGACGCACTGAACCGGAGGTTTCACTTTGACATCGATGTGAGTGCTAAGGATGG
GTACAAAATTAACAACAAATTGGACATTATCAAAGCACTTGAAGACACCCACACCAACCCAGTGGCAATG
TTTCAATACGACTGTGCCCTTCTCAACGGCATGGCCGTTGAAATGAAGAGAATGCAACAAGACATGTTCA
AGCCTCAACCACCCCTCCAGAATGTGTACCAGCTTGTTCAGGAGGTGATTGATCGGGTCGAGCTCCATGA
GAAAGTGTCGAGCCACCCGATCTTCAAGCAGATCTCAATTCCTTCCCAAAAATCTGTGTTGTACTTTCTC
ATTGAGAAGGGCCAACATGAGGCAGCAATTGAATTCTTTGAGGGCATGGTCCACGACTCTATTAAAGAGG
AACTCCAACCCCTCCTCCAACAAACTTCATTTGTGAAACGCGCTTTCAAGCGCCTGAAGGAAAATTTTGA
GATTGTTGCTCTGTGTTTAACACTTTTGGCAAACATTGTGATCATGGTCCGTGAGACTCGCAAGAGGCAG
AAAATGGTGGATGATGCAGTGAATGAGTACATTGAGAAAGCAAACATCACCACAGATGACAAGACTCTTG
ACGAGGCGGAGAAGAGCCCTCTAGAGACCAGCGGCGCCAGCACCGTTGGCTTTAGAGAGAGAACTCTCCC
AGGTCAAAAGGCATGCGATGACGTGAACTCCGAGCCTGCCCAACCTGTTGAGGAGCAACCACAAGCTGAA
GGACCCTACGCCGGACCACTCGAGCGTCAGAAACCTCTGAAAGTGAGAGCCAAGCTCCCACAGCAGGAGG
GGCCTTACGCTGGTCCAATGGAGAGACAGAAACCGCTAAAAGTGAAAGCAAAAGCCCCGGTCGTGAAGGA
AGGACCTTACGAGGGACCGGTGAAGAAGCCTGTCGCTTTGAAAGTGAAAGCTAAGAACCTGATTGTCACT
GAGAGTGGTGCCCCACCGACCGACTTGCAAAAGATGGTCATGGGCAACACAAAGCCTGTTGAGCTCATCC
TCGACGGGAAGACAGTAGCCATTTGCTGCGCTACTGGAGTGTTTGGCACTGCTTACCTCGTGCCTCGTCA
CCTCTTCGCAGAGAAGTATGACAAGATCATGTTGGACGGCAGAGCCATGACAGACAGTGACTACAGAGTG
TTTGAGTTTGAGATCAAAGTAAAAGGACAGGACATGCTCTCAGACGCCGCGCTCATGGTGCTCCACCGTG
GGAACCGCGTGAGGGACATCACGAAGCACTTTCGTGACACAGCAAGAATGAAGAAAGGCACCCCCGTTGT
CGGTGTGATTAACAACGCCGATGTCGGGAGACTGATTTTCTCCGGTGAGGCCCTTACTTACAAGGACATT
GTGGTTTGTATGGACGGAGACACCATGCCCGGCCTCTTTGCCTACAGAGCCGCCACCAAGGCTGGCTACT
GCGGAGGAGCCGTTCTCGCCAAAGACGGAGCTGACACTTTCATCGTCGGCACTCACTCTGCAGGAGGCAA
CGGAGTTGGATACTGCTCATGCGTTTCCAGGTCCATGCTTCTTAAAATGAAGGCACACATTGACCCCGAA
CCACATCACGAGGGGTTGATTGTGGACACCAGAGATGTGGAAGAGCGCGTTCACGTGATGCGCAAAACCA
AGCTTGCACCCACCGTTGCACACGGTGTGTTCAACCCCGAGTTTGGGCCCGCTGCCTTGTCCAACAAGGA
CCCGCGTCTGAACGAGGGTGTTGTCCTCGATGAAGTCATCTTCTCCAAACACAAGGGAGACACAAAGATG
TCTGAGGAGGACAAAGCGCTGTTCCGCCGCTGTGCTGCTGACTACGCGTCACGCCTGCACAGCGTGTTGG
GCACAGCAAATGCCCCATTGAGCATCTACGAGGCAATCAAGGGTGTCGACGGACTCGACGCCATGGAACC
AGATACAGCGCCCGGCCTCCCCTGGGCCCTCCAGGGTAAACGCCGCGGCGCGCTCATCGACTTCGAAAAC
GGCACGGTCGGACCCGAAGTCGAGGCTGCCCTGAAGCTCATGGAGAAGAGAGAATACAAATTTGCTTGTC
AGACCTTCCTGAAGGACGAGATTCGCCCGATGGAGAAAGTACGTGCCGGCAAGACTCGCATTGTCGACGT
CTTGCCCGTTGAGCATATTCTTTACACCAGGATGATGATTGGCAGATTTTGTGCACAGATGCACTCAAAC
AACGGACCGCAAATTGGCTCAGCGGTCGGTTGCAACCCTGATGTTGATTGGCAGAGATTTGGCACACACT
TCGCCCAGTACAGAAACGTGTGGGATGTGGACTATTCGGCCTTTGATGCTAATCACTGCAGTGATGCCAT
GAACATCATGTTTGAGGAGGTGTTTCGCACGGAGTTCGGCTTCCACCCGAATGCCGAGTGGATCCTGAAG
ACTCTTGTGAACACGGAACACGCCTATGAGAACAAACGCATCACTGTTGAAGGCGGAATGCCGTCTGGTT
GTTCCGCAACAAGCATCATCAACACAATTTTGAACAACATCTACGTGCTCTACGCCCTGCGTAGACACTA
TGAGGGAGTTGAGCTGGACACATACACCATGATCTCCTACGGAGACGACATCGTGGTGGCAAGTGATTAT
GACTTGGACTTCGAGGCTCTCAAGCCCCACTTTAAATCCCTTGGTCAAACCATCACTCCAGCTGACAAAA
GCGACAAAGGTTTTGTTCTTGGTCACTCCATTACCGATGTCACTTTCCTCAAAAGACACTTCCACATGGA
CTATGGAACTGGGTTTTACAAACCTGTGATGGCCTCAAAGACCCTTGAGGCTATCCTCTCCTTTGCACGC
CGTGGGACCATACAGGAGAAGTTGATCTCCGTGGCAGGACTCGCCGTCCACTCTGGACCAGACGAGTACC
GGCGTCTCTTTGAGCCTTTCCAAGGTCTCTTTGAGATTCCAAGCTACAGATCACTTTACCTGCGTTGGGT
GAACGCCGTGTGTGGTGACGCATAATCCCTCAGAGGCCACGACAACCGGGCTCTGAGGCGCGCGACACCT
TAGGAGTGAAAGCCTGAAAGGGCTTTTCCCGCTTCCTTAATCAAAAAAAAAAAAAA
>IP2b
GGTCTCACCCCTAGTAAGCCAACGACAGTCCCTGCGTTGCACTCCACACTTACGTTGTACACACGCGGGA
CCCGATGGACTTTCGTTCACCCACCTACAGCTGGACTCACGGCACCGCGTGGCCATTTTAGCTGGATTGT
GCGGACGAACACTGCTTGCGCACCTCGCGTGACCAGTTAGTACTCTTACCACTCTCCGCCTACTTGGTCG
TTAGCGCTGTCTTGGGCACTCCTGTTGGGGGCCGTTCGACGCTCCACGGGCTCTCCTGTGTGACATCTAC
GGTGATGGGGCCGTTTCGCGCGTGCTGGTCGTCTGGACTGCTTCGGCTGTCACCCGACGCCCGCCNNNNN
CCCCCCCCCCCCNNNNNTTTACCGTCGTTCCCGACGTAAAAGGGAGGTAACCACAAGCTTGAAACCGTCC
AGCCCGACGAAAAAGGGTGGTAACCACAAGCTTACTGCCGTCTTTCCCGACGTTAAAGGGATGAAACCAC
AAGACTTACCTTCGCTCGGAAGTAAAACGACAAACACGCACAGTTTTGCCCGTTTTCATGAGAAATGGGA
CGTCTGCGCACGAAACGCGCCGTCGCTTGAGGAGGACTTGTACAAACACGATCTATGCAGGTTTCCCCAA
CTGACACAAACCGTGCAACTTGAAACTCCGCCTGGTCTTTCCAGGTCTAGAGGGGTAACATTTTGTACTG
TGTTTGACTCCACGCTCGATCCACTAGCGAGTGTTAGTAGCGGTACTGCTGTCTCGTAGCGGAGCATGTT
GGCCGTGGGAACACCTCCTTGGTAACAAGGACCCACGGGGCCGAAAGCCACGTCCTAACGGACCCAACAT
GTGTGCAACCCCAGCACGGCAGCTTTACTGTGAAACCCACTTCAAGGTGACATTGATACTGGTACTCAAA
CACTGGTGACAGGCTAAGGATGCCCTTCAGGTACCCCGAGGTAACAAGCGACACTCGGGATCTGAGAAGG
GGACTGGGACTTCTTTAAAGTGCCCAGTTTAAAAAGCTTCTACGCCTGAATAGGTGACCGGAGGCCGGCA
CCTTTCCTTTTATAAACACTGAACACATGAATACAACTGACTGTTTTATCGCTTTGGTACAGGCTATCAG
AGAGATTAAAGCACTTTTCCTACCACGCACCACAGGAAAAATGGAACTGACACTGTACAACGGTGAGAAG
AAGACCTTTTACTCCAGGCCCAACAACCACGACAACTGCTGGTTGAACGCCATCCTCCAGTTGTTCAGGT
ACGTTGAAGAACCATTCTTCGACTGGGTCTACAGTTCGCCTGAGAACCTCACGCTTGAAGCCATCAAGCA
GTTGGAGGACCTCACAGGGCTTGAACTGCACGAGGGTGGACCACCTGCTCTCGTGATCTGGAACATCAAG
CACTTGCTCCACACCGGCATTGGCACCGCCTCGCGACCCAGCGAGGTGTGCATGGTGGATGGTACGGACA
TGTGCTTGGCTGATTTCCATGCAGGCATTTTCCTTAAGGGGCAAGAACACGCTGTGTTCGCGTGTGTCAC
CTCCAACGGGTGGTACGCGATTGATGATGAGGACTTCTACCCCTGGACGCCGGACCCATCCGACGTTCTG
GTGTTTGTCCCGTACGATCAAGAACCACTCAACGGGGAATGGAAAGCCAAGGTTCAACGCAAGCTCAAAG
GGGCTGGACAATCCAGTCCAGCGACCGGCTCGCAGAACCAATCTGGCAATACTGGCAGCATAATAAACAA
CTACTACATGCAGCAGTATCAAAACTCCATGGACACACAGCTTGGTGACAACGCAATCAGTGGAGGCTCT
AACGAGGGCTCCACCGACACAACCTCCACCCACACAACCAACACCCAGAACAATGACTGGTTCTCCAAAC
TTGCAAGCTCTGCTTTCAGCGGTCTTTTCGGCGCTCTTCTCGCCGACAAGAAGACAGAGGAGACCACTCT
CCTCGAAGACCGCATCCTCACCACCCGTAACGGCCACACCACGTCGACAACCCAGTCAAGCGTTGGAGTC
ACATACGGGTACGCAACAGCTGAGGATTTTGTGAGCGGACCGAACACTTCTGGTCTCGAGACCAGAGTTG
TGCAGGCAGAACGGTTTTTCAAAACCCACCTCTTCGACTGGGTCACCAGTGACTCATTCGGACGTTGCCA
CCTCCTGGAACTCCCGACCGACCACAAAGGTGTCTACGGCAGCCTGACCGACTCGTATGCATATATGAGG
AACGGCTGGGATGTCGAGGTCACCGCGGTTGGCAACCAGTTCAACGGAGGGTGCCTGCTGGTCGCAATGG
TACCAGAGCTTTGTTCTATCCAAAAGAGGGAACTGTACCAGCTCACACTCTTCCCTCACCAGTTCATCAA
CCCACGCACGAACATGACTGCGCACATTACAGTGCCCTTTGTTGGCGTCAACCGCTACGACCAGTACAAG
GTTCACAAGCCTTGGACCCTTGTGGTTATGGTTGTAGCCCCTCTGACCGTCAACACTGAAGGTGCCCCTC
AGATCAAGGTGTATGCCAACGTTGCCCCAACTAACGTGCACGTCGCGGGTGAGTTTCCTTCCAAAGAGGG
AATATTCCCCGTGGCCTGTAGCGACGGCTATGGTGGCCTGGTGACCACGGACCCGAAGACGGCTGACCCC
GTTTATGGGAAAGTGTTCAACCCCCCCCGCAACCAGTTGCCGGGGCGTTTTACCAACCTCCTTGATGTGG
CTGAGGCATGCCCGACGTTTCTGCACTTCGAGGGTGGCGTACCGTACGTGACCACGAAAACAGACTCGGA
CAGGGTGCTTGCTCAGTTTGATATGTCTTTGGCAGCAAAACACATGTCAAACACCTTCCTCGCAGGTCTT
GCGCAGTACTACACACAGTACAGTGGCACCATCAACCTGCACTTCATGTTCACAGGACCCACTGACGCGA
AGGCGCGTTACATGATTGCCTACGCCCCACCGGGCATGGAGCCGCCCAAGACACCTGAGGCGGCCGCGCA
CTGCATTCATGCTGAATGGGACACTGGGTTGAACTCAAAGTTTACTTTTTCCATCCCCTACCTCTCGGCC
GCCGATTACGCGTACACCGCGTCTGACGTGGCCGAGACCACAAATGTGCAGGGATGGGTCTGCTTGTTTC
AAATTACACATGGCAAGGCCGACGGCGACGCTCTGGTCGTACTGGCTAGTGCTGGTAAAGACTTTGAGCT
AAGGCTGCCGGTGGACGCCCGTGCGGAAACCACTTCTGCGGGCGAGTCAGCGGATCCTGTCACCACCACT
GTTGAAAACTACGGTGGCGAAACACAGATCCAGAGGCGCCAACACACGGACGTCTCGTTCATTATGGACA
GATTTGTGAAAGTGACACCGCAAAACCAAATTAACATTTTGGACCTCATGCAGGTCCCATCACACACTTT
GGTGGGAGCGCTCCTACGCGCGTCCACTTACTACTTCTCTGACTTGGAGATAGCAGTAAAACACGAGGGA
GACCTCACCTGGGTTCCAAATGGAGCGCCTGAAAAGGCGTTGGACAACACCACCAACCCAACTGCTTACC
ACAAGGCACCACTCACCCGGCTTGCCCTGCCCTACACTGCGCCCCACCGCGTGTTGGCAACCGTGTACAA
CGGTGAGTGCAGGTACAGCAGAAATGCTGTGCCCAACTTGAGAGGTGACCTTCAAGTGTTGGCTCAAAAG
GTGGCACGGACGCTGCCTACCTCCTTCAACTACGGTGCCATCAAAGCGACCCGGGTCACCGAGTTGCTTT
ACCGGATGAAGAGGGCCGAAACATACTGTCCAAGGCCCTTGCTGGCAATCCACCCAACTGAAGCCAGACA
CAAACAGAAAATTGTGGCACCGGTGAAACAGACTTTGAATTTTGACCTTCTGAAGTTGGCAGGAGACGTT
GAGTCCAACCCTGGGCCCTTCTTCTTCTCCGACGTTAGGTCGAACTTCTCCAAACTGGTGGAAACTATCA
ACCAGATGCAGGAGGACATGTCAACAAAACACGGGCCYGACTTTAACCGGTTAGTGTCCGCATTTGAGGA
ATTGGCCATTGGAGTGAAAGCCATCAGAACCGGTCTCGACGAGGCCAAACCCTGGTACAAGCTTATCAAG
CTCCTAAGCCGCCTGTCGTGCATGGCCGCTGTGGCAGCACGGTCCAAGGACCCAGTCCTTGTGGCCATCA
TGCTGGCCGACACCGGTCTCGAGATTCTGGACAGCACCTTCGTCGTGAAGAAGATCTCCGACTCGCTCTC
CAGTCTCTTTCACGTGCCGGCCCCCGTCTTCAGTTTCGGAGCACCGGTCCTGTTGGCCGGGTTGGTCAAA
GTCGCCTCGAGTTTCTTCCGGTCTACACCCGAAGACCTTGAGAGAGCAGAGAAACAGCTCAAAGCACGTG
ACATCAACGACATCTTCGCCATTCTCAAGAACGGCGAGTGGCTGGTCAAACTGATCCTTGCCATCCGCGA
CTGGATTAAGGCTTGGATCGCCTCAGAAGAGAAGTTTGTCACCATGACAGACTTGGTGCCTGGCATCCTT
GAAAAGCAGCGGGATCTGAACGACCCGAGCAAGTACAAGGAAGCCAAGGAGTGGCTCGACAACGCGCGCC
AAGCGTGTTTGAAGAGCGGGAACGTCCACATTGCCAACCTGTGTAAAGTGGTCGCTCCAGCACCCAGCAA
GTCGAGGCCCGAACCCGTGGTTGTTTGTCTCCGCGGCAAATCTGGCCAGGGCAAGAGCTTCCTTGCAAAC
GTGCTTGCACAGGCAATTTCCGCCCACTTCACCGGCAGAACCGACTCAGTGTGGTACTGCCCACCTGACC
CTGACCACTTCGACGGTTACAACCAGCAAACCGTCGTTGTGATGGATGATTTGGGCCAGAACCCTGACGG
CAAGGACTTCAAATACTTTGCCCAAATGGTCTCGACCACAGGGTTCATCCCGCCCATGGCATCACTCGAG
GACAAAGGTAAACCTTTCAACAGCAAAGTCATCATCGCGACCACCAACTTGTACTCGGGCTTCACCCCGA
GGACTATGGTGTGTCCCGACGCACTGAACCGGAGGTTTCACTTTGACATCGATGTGAGTGCTAAGGATGG
GTACAAAATTAACAACAAATTGGACATTATCAAAGCACTTGAAGACACCCACACCAACCCAGTGGCAATG
TTTCAATACGACTGTGCCCTTCTCAACGGCATGGCCGTTGAAATGAAGAGAATGCAACAAGACATGTTCA
AGCCTCAACCACCCCTCCAGAATGTGTACCAGCTTGTTCAGGAGGTGATTGATCGGGTCGAGCTCCATGA
GAAAGTGTCGAGCCACCCGATCTTCAAGCAGATCTCAATTCCTTCCCAAAAATCTGTGTTGTACTTTCTC
ATTGAGAAGGGCCAACATGAGGCAGCAATTGAATTCTTTGAGGGCATGGTCCACGACTCTATTAAAGAGG
AACTCCAACCCCTCCTCCAACAAACTTCATTTGTGAAACGCGCTTTCAAGCGCCTGAAGGAAAATTTTGA
GATTGTTGCTCTGTGTTTAACACTTTTGGCAAACATTGTGATCATGGTCCGTGAGACTCGCAAGAGGCAG
AAAATGGTGGATGATGCAGTGAATGAGTACATTGAGAAAGCAAACATCACCACAGATGACAAGACTCTTG
ACGAGGCGGAGAAGAGCCCTCTAGAGACCAGCGGCGCCAGCACCGTTGGCTTTAGAGAGAGAACTCTCCC
AGGTCAAAAGGCATGCGATGACGTGAACTCCGAGCCTGCCCAACCTGTTGAGGAGCAACCACAAGCTGAA
GGACCCTACGCCGGACCACTCGAGCGTCAGAAACCTCTGAAAGTGAGAGCCAAGCTCCCACAGCAGGAGG
GGCCTTACGCTGGTCCAATGGAGAGACAGAAACCGCTAAAAGTGAAAGCAAAAGCCCCGGTCGTGAAGGA
AGGACCTTACGAGGGACCGGTGAAGAAGCCTGTCGCTTTGAAAGTGAAAGCTAAGAACCTGATTGTCACT
GAGAGTGGTGCCCCACCGACCGACTTGCAAAAGATGGTCATGGGCAACACAAAGCCTGTTGAGCTCATCC
TCGACGGGAAGACAGTAGCCATTTGCTGCGCTACTGGAGTGTTTGGCACTGCTTACCTCGTGCCTCGTCA
CCTCTTCGCAGAGAAGTATGACAAGATCATGTTGGACGGCAGAGCCATGACAGACAGTGACTACAGAGTG
TTTGAGTTTGAGATCAAAGTAAAAGGACAGGACATGCTCTCAGACGCCGCGCTCATGGTGCTCCACCGTG
GGAACCGCGTGAGGGACATCACGAAGCACTTTCGTGACACAGCAAGAATGAAGAAAGGCACCCCCGTTGT
CGGTGTGATTAACAACGCCGATGTCGGGAGACTGATTTTCTCCGGTGAGGCCCTTACTTACAAGGACATT
GTGGTTTGTATGGACGGAGACACCATGCCCGGCCTCTTTGCCTACAGAGCCGCCACCAAGGCTGGCTACT
GCGGAGGAGCCGTTCTCGCCAAAGACGGAGCTGACACTTTCATCGTCGGCACTCACTCTGCAGGAGGCAA
CGGAGTTGGATACTGCTCATGCGTTTCCAGGTCCATGCTTCTTAAAATGAAGGCACACATTGACCCCGAA
CCACATCACGAGGGGTTGATTGTGGACACCAGAGATGTGGAAGAGCGCGTTCACGTGATGCGCAAAACCA
AGCTTGCACCCACCGTTGCACACGGTGTGTTCAACCCCGAGTTTGGGCCCGCTGCCTTGTCCAACAAGGA
CCCGCGTCTGAACGAGGGTGTTGTCCTCGATGAAGTCATCTTCTCCAAACACAAGGGAGACACAAAGATG
TCTGAGGAGGACAAAGCGCTGTTCCGCCGCTGTGCTGCTGACTACGCGTCACGCCTGCACAGCGTGTTGG
GCACAGCAAATGCCCCATTGAGCATCTACGAGGCAATCAAGGGTGTCGACGGACTCGACGCCATGGAACC
AGATACAGCGCCCGGCCTCCCCTGGGCCCTCCAGGGTAAACGCCGCGGCGCGCTCATCGACTTCGAAAAC
GGCACGGTCGGACCCGAAGTCGAGGCTGCCCTGAAGCTCATGGAGAAGAGAGAATACAAATTTGCTTGTC
AGACCTTCCTGAAGGACGAGATTCGCCCGATGGAGAAAGTACGTGCCGGCAAGACTCGCATTGTCGACGT
CTTGCCCGTTGAGCATATTCTTTACACCAGGATGATGATTGGCAGATTTTGTGCACAGATGCACTCAAAC
AACGGACCGCAAATTGGCTCAGCGGTCGGTTGCAACCCTGATGTTGATTGGCAGAGATTTGGCACACACT
TCGCCCAGTACAGAAACGTGTGGGATGTGGACTATTCGGCCTTTGATGCTAATCACTGCAGTGATGCCAT
GAACATCATGTTTGAGGAGGTGTTTCGCACGGAGTTCGGCTTCCACCCGAATGCCGAGTGGATCCTGAAG
ACTCTTGTGAACACGGAACACGCCTATGAGAACAAACGCATCACTGTTGAAGGCGGAATGCCGTCTGGTT
GTTCCGCAACAAGCATCATCAACACAATTTTGAACAACATCTACGTGCTCTACGCCCTGCGTAGACACTA
TGAGGGAGTTGAGCTGGACACATACACCATGATCTCCTACGGAGACGACATCGTGGTGGCAAGTGATTAT
GACTTGGACTTCGAGGCTCTCAAGCCCCACTTTAAATCCCTTGGTCAAACCATCACTCCAGCTGACAAAA
GCGACAAAGGTTTTGTTCTTGGTCACTCCATTACCGATGTCACTTTCCTCAAAAGACACTTCCACATGGA
CTATGGAACTGGGTTTTACAAACCTGTGATGGCCTCAAAGACCCTTGAGGCTATCCTCTCCTTTGCACGC
CGTGGGACCATACAGGAGAAGTTGATCTCCGTGGCAGGACTCGCCGTCCACTCTGGACCAGACGAGTACC
GGCGTCTCTTTGAGCCTTTCCAAGGTCTCTTTGAGATTCCAAGCTACAGATCACTTTACCTGCGTTGGGT
GAACGCCGTGTGTGGTGACGCATAATCCCTCAGAGGCCACGACAACCGGGCTCTGAGGCGCGCGACACCT
TAGGAGTGAAAGCCTGAAAGGGCTTTTCCCGCTTCCTTAATCTAAAAAAAAAAAAA
>IP3b
GGTCTCACCCCTAGTAAGCCAACGACAGTCCCTGCGTTGCACTCCACACTTACGTTGTACACACGCGGGA
CCCGATGGACTTTCGTTCACCCACCTACAGCTGGACTCACGGCACCGCGTGGCCATTTTAGCTGGATTGT
GCGGACGAACACTGCTTGCGCACCTCGCGTGACCAGTTAGTACTCTTACCACTCTCCGCCTACTTGGTCG
TTAGCGCTGTCTTGGGCACTCCTGTTGGGGGCCGTTCGACGCTCCACGGGCTCTCCTGTGTGACATCTAC
GGTGATGGGGCCGTTTCGCGCGTGCTGGTCGTCTGGACTGCTTCGGCTGTCACCCGACGCCCGCCNNNNN
CCCCCCCCCCCCNNNNNTTTACCGTCGTTCCCGACGTAAAAGGGAGGTAACCACAAGCTTGAAACCGTCC
AGCCCGACGAAAAAGGGTGGTAACCACAAGCTTACTGCCGTCTTTCCCGACGTTAAAGGGATGAAACCAC
AAGACTTACCTTCGCTCGGAAGTAAAACGACAAACACGCACAGTTTTGCCCGTTTTCATGAGAAATGGGA
CGTCTGCGCACGAAACGCGCCGTCGCTTGAGGAGGACTTGTACAAACACGATCTATGCAGGTTTCCCCAA
CTGACACAAACCGTGCAACTTGAAACTCCGCCTGGTCTTTCCAGGTCTAGAGGGGTAACATTTTGTACTG
TGTTTGACTCCACGCTCGATCCACTAGCGAGTGTTAGTAGCGGTACTGCTGTCTCGTAGCGGAGCATGTT
GGCCGTGGGAACACCTCCTTGGTAACAAGGACCCACGGGGCCGAAAGCCACGTCCTAACGGACCCAACAT
GTGTGCAACCCCAGCACGGCAGCTTTACTGTGAAACCCACTTCAAGGTGACATTGTTACTGGTACTCAAA
CACTGGTGACAGGCTAAGGATGCCCTTCAGGTACCCCGAGGTAACAAGCGACACTCGGGATCTGAGAAGG
GGACTGGGACTTCTTTAAAGTGCCCAGTTTAAAAAGCTTCTACGCCTGAATAGGTGACCGGAGGCCGGCA
CCTTTCCTTTTATAAACACTGAACACATGAATACAACTGACTGTTTTATCGCTTTGGTACAGGCTATCAG
AGAGATTAAAGCACTTTTCCTACCACGCACCACAGGAAAAATGGAACTGACACTGTACAACGGTGAGAAG
AAGACCTTTTACTCCAGGCCCAACAACCACGACAACTGCTGGTTGAACGCCATCCTCCAGTTGTTCAGGT
ACGTTGAAGAACCATTCTTCGACTGGGTCTACAGTTCGCCTGAGAACCTCACGCTTGAAGCCATCAAGCA
GTTGGAGGACCTCACAGGGCTTGAACTGCACGAGGGTGGACCACCTGCTCTCGTGATCTGGAACATCAAG
CACTTGCTCCACACCGGCATTGGCACCGCCTCGCGACCCAGCGAGGTGTGCATGGTGGATGGTACGGACA
TGTGCTTGGCTGATTTCCATGCAGGCATTTTCCTTAAGGGGCAAGAACACGCTGTGTTCGCGTGTGTCAC
CTCCAACGGGTGGTACGCGATTGATGATGAGGACTTCTACCCCTGGACGCCGGACCCATCCGACGTTCTG
GTGTTTGTCCCGTACGATCAAGAACCACTCAACGGGGAATGGAAAGCCAAGGTTCAACGCAAGCTCAAAG
GGGCTGGACAATCCAGTCCAGCGACCGGCTCGCAGAACCAATCTGGCAATACTGGCAGCATAATAAACAA
CTACTACATGCAGCAGTATCAAAACTCCATGGACACACAGCTTGGTGACAACGCAATCAGTGGAGGCTCT
AACGAGGGCTCCACCGACACAACCTCCACCCACACAACCAACACCCAGAACAATGACTGGTTCTCCAAAC
TTGCAAGCTCTGCTTTCAGCGGTCTTTTCGGCGCTCTTCTCGCCGACAAGAAGACAGAGGAGACCACTCT
CCTCGAAGACCGCATCCTCACCACCCGTAACGGCCACACCACGTCGACAACCCAGTCAAGCGTTGGAGTC
ACATACGGGTACGCAACAGCTGAGGATTTTGTGAGCGGACCGAACACTTCTGGTCTCGAGACCAGAGTTG
TGCAGGCAGAACGGTTTTTCAAAACCCACCTCTTCGACTGGGTCACCAGTGACTCATTCGGACGTTGCCA
CCTCCTGGAACTCCCGACCGACCACAAAGGTGTCTACGGCAGCCTGACCGACTCGTATGCATATATGAGG
AACGGCTGGGATGTCGAGGTCACCGCGGTTGGCAACCAGTTCAACGGAGGGTGCCTGCTGGTCGCAATGG
TACCAGAGCTTTGTTCTATCCAAAAGAGGGAACTGTACCAGCTCACACTCTTCCCTCACCAGTTCATCAA
CCCACGCACGAACATGACTGCGCACATTACAGTGCCCTTTGTTGGCGTTAACCGCTACGACCAGTACAAG
GTTCACAAGCCTTGGACCCTTGTGGTTATGGTTGTAGCCCCTCTGACCGTCAACACTGAAGGTGCCCCTC
AGATCAAGGTGTATGCCAACATTGCCCCAACTAACGTGCACGTCGCGGGTGAGTTTCCTTCCAAAGAGGG
AATATTCCCCGTGGCCTGTAGCGACGGCTATGGTGGCCTGGTGACCACGGACCCGAAGACGGCTGACCCC
GTTTATGGGAAAGTGTTCAACCCCCCCCGCAACCAGTTGCCGGGGCGTTTTACCAACCTCCTTGATGTGG
CTGAGGCATGCCCGACGTTTCTGCACTTCGAGGGTGGCGTACCGTACGTGACCACGAAAACAGACTCGGA
CAGGGTGCTTGCTCAGTTTGATATGTCTTTGGCAGCAAAACACATGTCAAACACCTTCCTCGCAGGTCTT
GCGCAGTACTACACACAGTACAGTGGCACCATCAACCTGCACTTCATGTTCACAGGACCCACTGACGCGA
AGGCGCGTTACATGATTGCCTACGCCCCACCGGGCATGGAGCCGCCCAAGACACCTGAGGCGGCCGCGCA
CTGCATTCATGCTGAATGGGACACTGGGTTGAACTCAAAGTTTACTTTTTCCATCCCCTACCTCTCGGCC
GCCGATTACGCGTACACCGCGTCTGACGTGGCCGAGACCACAAATGTGCAGGGATGGGTCTGCTTGTTTC
AAATTACACATGGCAAGGCCGACGGCGACGCTCTGGTCGTACTGGCTAGTGCTGGTAAAGACTTTGAGCT
AAGGCTGCCGGTGGACGCCCGTGCGGAAACCACTTCTGCGGGCGAGTCAGCGGATCCTGTCACCACCACT
GTTGAAAACTACGGTGGCGAAACACAGATCCAGAGGCGCCAACACACGGACGTCTCGTTCATTATGGACA
GATTTGTGAAAGTGACACCGCAAAACCAAATTAACATTTTGGACCTCATGCAGGTCCCATCACACACTTT
GGTGGGAGCGCTCCTACGCGCGTCCACTTACTACTTCTCTGACTTGGAGATAGCAGTAAAACACGAGGGA
GACCTCACCTGGGTTCCAAATGGAGCGCCTGAAAAGGCGTTGGACAACACCACCAACCCAACTGCTTACC
ACAAGGCACCACTCACCCGGCTTGCCCTGCCCTACACTGCGCCCCACCGCGTGTTGGCAACCGTGTACAA
CGGTGAGTGCAGGTACAGCAGAAATGCTGTGCCCAACTTGAGAGGTGACCTTCAAGTGTTGGCTCAAAAG
GTGGCACGGACGCTGCCTACCTCCTTCAACTACGGTGCCATCAAAGCGACCCGGGTCACCGAGTTGCTTT
ACCGGATGAAGAGGGCCGAAACATACTGTCCAAGGCCCTTGCTGGCAATCCACCCAACTGAAGCCAGACA
CAAACAGAAAATTGTGGCACCGGTGAAACAGACTTTGAATTTTGACCTTCTGAAGTTGGCAGGAGACGTT
GAGTCCAACCCTGGGCCCTTCTTCTTCTCCGACGTTAGGTCGAACTTCTCCAAACTGGTGGAAACTATCA
ACCAGATGCAGGAGGACATGTCAACAAAACACGGGCCTGACTTTAACCGGTTAGTGTCCGCATTTGAGGA
ATTGGCCATTGGAGTGAAAGCCATCAGAACCGGTCTCGACGAGGCCAAACCCTGGTACAAGCTTATCAAG
CTCCTAAGCCGCCTGTCGTGCATGGCCGCTGTGGCAGCACGGTCCAAGGACCCAGTCCTTGTGGCCATCA
TGCTGGCCGACACCGGTCTCGAGATTCTGGACAGCACCTTCGTCGTGAAGAAGATCTCCGACTCGCTCTC
CAGTCTCTTTCACGTGCCGGCCCCCGTCTTCAGTTTCGGAGCACCGGTCCTGTTGGCCGGGTTGGTCAAA
GTCGCCTCGAGTTTCTTCCGGTCTACACCCGAAGACCTTGAGAGAGCAGAGAAACAGCTCAAAGCACGTG
ACATCAACGACATCTTCGCCATTCTCAAGAACGGCGAGTGGCTGGTCAAACTGATCCTTGCCATCCGCGA
CTGGATTAAGGCTTGGATCGCCTCAGAAGAGAAGTTTGTCACCATGACAGACTTGGTGCCTGGCATCCTT
GAAAAGCAGCGGGATCTGAACGACCCGAGCAAGTACAAGGAAGCCAAGGAGTGGCTCGACAACGCGCGCC
AGGCGTGTTTGAAGAGCGGGAACGTCCACATTGCCAACCTGTGTAAAGTGGTCGCTCCAGCACCCAGCAA
GTCGAGGCCCGAACCCGTGGTTGTTTGTCTCCGCGGCAAATCTGGCCAGGGCAAGAGCTTCCTTGCAAAC
GTGCTTGCACAGGCAATTTCCGCCCACTTCACCGGCAGAACCGACTCAGTGTGGTACTGCCCACCTGACC
CTGACCACTTCGACGGTTACAACCAGCAAACCGTCGTTGTGATGGATGATTTGGGCCAGAACCCTGACGG
CAAGGACTTCAAATACTTTGCCCAAATGGTCTCGACCACAGGGTTCATCCCGCCCATGGCATCACTCGAG
GACAAAGGTAAACCTTTCAACAGCAAAGTCATCATCGCGACCACCAACTTGTACTCGGGCTTCACCCCGA
GGACTATGGTGTGTCCCGACGCACTGAACCGGAGGTTTCACTTTGACATCGATGTGAGTGCTAAGGATGG
GTACAAAATTAACAACAAATTGGACATTATCAAAGCACTTGAAGACACCCACACCAACCCAGTGGCAATG
TTTCAATACGACTGTGCCCTTCTCAACGGCATGGCCGTTGAAATGAAGAGAATGCAACAAGACATGTTCA
AGCCTCAACCACCCCTCCAGAATGTGTACCAGCTTGTTCAGGAGGTGATTGATCGGGTCGAGCTCCATGA
GAAAGTGTCGAGCCACCCGATCTTCAAGCAGATCTCAATTCCTTCCCAAAAATCTGTGTTGTACTTTCTC
ATTGAGAAGGGCCAACATGAGGCAGCAATTGAATTCTTTGAGGGCATGGTCCACGACTCTATTAAGGAGG
AACTCCAACCCCTCCTCCAACAAACTTCATTTGTGAAACGCGCTTTCAAGCGCCTGAAGGAAAATTTTGA
GATTGTTGCTCTGTGTTTAACACTTTTGGCAAACATTGTGATCATGGTCCGTGAGACTCGCAAGAGGCAG
AAAATGGTGGATGATGCAGTGAATGAGTACATTGAGAAAGCAAACATCACCACAGATGACAAGACTCTTG
ACGAGGCGGAGAAGAGCCCTCTAGAGACCAGCGGCGCCAGCACCGTTGGCTTTAGAGAGAGAACTCTCCC
AGGTCAAAAGGCATGCGATGACGTGAACTCCGAGCCTGCCCAACCTGTTGAGGAGCAACCACAAGCTGAA
GGACCCTACGCCGGACCACTCGAGCGTCAGAAACCTCTGAAAGTGAGAGCCAAGCTCCCACAGCAGGAGG
GGCCTTACGCTGGTCCAATGGAGAGACAGAAACCGCTAAAAGTGAAAGCAAAAGCCCCGGTCGTGAAGGA
AGGACCTTACGAGGGACCGGTGAAGAAGCCTGTCGCTTTGAAAGTGAAAGCTAAGAACCTGATTGTCACT
GAGAGTGGTGCCCCACCGACCGACTTGCAAAAGATGGTCATGGGCAACACAAAGCCTGTTGAGCTCATCC
TCGACGGGAAGACAGTAGCCATTTGCTGCGCTACTGGAGTGTTTGGCACTGCTTACCTCGTGCCTCGCCA
CCTCTTCGCAGAGAAGTATGACAAGATCATGTTGGACGGCAGAGCCATGACAGACAGTGACTACAGAGTG
TTTGAGTTTGAGATCAAAGTAAAAGGACAGGACATGCTCTCAGACGCCGCGCTCATGGTGCTCCACCGTG
GGAACCGCGTGAGGGACATCACGAAGCACTTTCGTGACACAGCAAGAATGAAGAAAGGCACCCCCGTTGT
CGGTGTGATTAACAACGCCGATGTCGGGAGACTGATTTTCTCCGGTGAGGCCCTTACTTACAAGGACATT
GTGGTTTGTATGGACGGAGACACCATGCCCGGCCTCTTTGCCTACAGAGCCGCCACCAAGGCTGGCTACT
GCGGAGGAGCCGTTCTCGCCAAAGACGGAGCTGACACTTTCATCGTCGGCACTCACTCTGCAGGAGGCAA
CGGAGTTGGATACTGCTCATGCGTTTCCAGGTCCATGCTTCTTAAAATGAAGGCACACATTGACCCCGAA
CCACACCACGAGGGGTTGATTGTGGACACCAGAGATGTGGAAGAGCGCGTTCACGTGATGCGCAAAACCA
AGCTTGCACCCACCGTTGCACACGGTGTGTTCAACCCCGAGTTTGGGCCCGCTGCCTTGTCCAACAAGGA
CCCGCGTCTGAACGAGGGTGTTGTCCTCGATGAAGTCATCTTCTCCAAACACAAGGGAGACACAAAGATG
TCTGAGGAGGACAAAGCGCTGTTCCGCCGCTGTGCTGCTGACTACGCGTCACGCCTGCACAGCGTGTTGG
GCACAGCAAATGCCCCATTGAGCATCTACGAGGCAATCAAGGGTGTCGACGGACTCGACGCCATGGAACC
AGATACAGCGCCCGGCCTCCCCTGGGCCCTCCAGGGTAAACGCCGCGGCGCGCTCATCGACTTCGAAAAC
GGCACGGTCGGACCCGAAGTCGAGGCTGCCCTGAAGCTCATGGAGAAGAGAGAATACAAATTTGCTTGTC
AGACTTTCCTGAAGGACGAGATTCGCCCGATGGAGAAAGTACGTGCCGGCAAGACTCGCATTGTCGACGT
CTTGCCCGTTGAGCATATTCTTTACACCAGGATGATGATTGGCAGATTTTGTGCACAGATGCACTCAAAC
AACGGACCGCAAATTGGCTCAGCGGTCGGTTGCAACCCTGATGTTGATTGGCAGAGATTTGGCACACACT
TCGCCCAGTACAGAAACGTGTGGGATGTGGACTATTCGGCCTTTGATGCTAATCACTGCAGTGATGCCAT
GAACATCATGTTTGAGGAGGTGTTTCGCACGGAGTTCGGCTTCCACCCGAATGCCGAGTGGATCCTGAAG
ACTCTTGTGAACACGGAACACGCCTATGAGAACAAACGCATCACTGTTGAAGGCGGAATGCCGTCTGGTT
GTTCCGCAACAAGCATCATCAACACAATTTTGAACAACATCTACGTGCTCTACGCCCTGCGTAGACACTA
TGAGGGAGTTGAGCTGGACACATACACCATGATCTCCTACGGAGACGACATCGTGGTGGCAAGTGATTAT
GACTTGGACTTTGAGGCTCTCAAGCCCCACTTCAAATCCCTTGGTCAAACCATCACTCCAGCTGACAAAA
GCGACAAAGGTTTTGTTCTTGGTCACTCCATTACCGATGTCACTTTCCTCAAAAGACACTTCCACATGGA
CTATGGAACTGGGTTTTACAAACCTGTGATGGCCTCAAAGACCCTTGAGGCTATCCTCTCCTTTGCACGC
CGTGGGACCATACAGGAGAAGTTGATCTCCGTGGCAGGACTCGCCGTCCACTCTGGACCAGACGAGTACC
GGCGTCTCTTTGAGCCTTTCCAAGGTCTCTTTGAGATTCCAAGCTACAGATCACTTTACCTGCGTTGGGT
GAACGCCGTGTGTGGTGACGCATAATCCCTCAGAGGCCACGACAACCGGGCTCTGAGGCGCGCGACACCT
TAGGAGTGAAAGCCTGAAAGGGCTTTTCCCGCTTCCTTAATCTAAAAAAAAAAAAA
>IP3c
GGTCTCACCCCTAGTAAGCCAACGACAGTCCCTGCGTTGCACTCCACACTTACGTTGTACACACGCGGGA
CCCGATGGACTTTCGTTCACCCACCTACAGCTGGACTCACGGCACCGCGTGGCCATTTTAGCTGGATTGT
GCGGACGAACACTGCTTGCGCACCTCGCGTGACCAGTTAGTACTCTTACCACTCTCCGCCTACTTGGTCG
TTAGCGCTGTCTTGGGCACTCCTGTTGGGGGCCGTTCGACGCTCCACGGGCTCTCCTGTGTGACATCTAC
GGTGATGGGGCCGTTTCGCGCGTGCTGGTCGTCTGGACTGCTTCGGCTGTCACCCGACGCCCGCCNNNNN
CCCCCCCCCCCCNNNNNTTTACCGTCGTTCCCGACGTAAAAGGGAGGTAACCACAAGCTTGAAACCGTCC
AGCCCGACGAAAAAGGGTGGTAACCACAAGCTTACTGCCGTCTTTCCCGACGTTAAAGGGATGAAACCAC
AAGACTTACCTTCGCTCGGAAGTAAAACGACAAACACGCACAGTTTTGCCCGTTTTCATGAGAAATGGGA
CGTCTGCGCACGAAACGCGCCGTCGCTTGAGGAGGACTTGTACAAACACGATCTATGCAGGTTTCCCCAA
CTGACACAAACCGTGCAACTTGAAACTCCGCCTGGTCTTTCCAGGTCTAGAGGGGTAACATTTTGTACTG
TGTTTGACTCCACGCTCGATCCACTAGCGAGTGTTAGTAGCGGTACTGCTGTCTCGTAGCGGAGCATGTT
GGCCGTGGGAACACCTCCTTGGTAACAAGGACCCACGGGGCCGAAAGCCACGTCCTAACGGACCCAACAT
GTGTGCAACCCCAGCACGGCAGCTTTACTGTGAAACCCACTTCAAGGTGACATTGTTACTGGTACTCAAA
CACTGGTGACAGGCTAAGGATGCCCTTCAGGTACCCCGAGGTAACAAGCGACACTCGGGATCTGAGAAGG
GGACTGGGACTTCTTTAAAGTGCCCAGTTTAAAAAGCTTCTACGCCTGAATAGGTGACCGGAGGCCGGCA
CCTTTCCTTTTATAAACACTGAACACATGAATACAACTGACTGTTTTATCGCTTTGGTACAGGCTATCAG
AGAGATTAAAGCACTTTTCCTACCACGCACCACAGGAAAAATGGAACTGACACTGTACAACGGTGAGAAG
AAGACCTTTTACTCCAGGCCCAACAACCACGACAACTGCTGGTTGAACGCCATCCTCCAGTTGTTCAGGT
ACGTTGAAGAACCATTCTTCGACTGGGTCTACAGTTCGCCTGAGAACCTCACGCTTGAAGCCATCAAGCA
GTTGGAGGACCTCACAGGGCTTGAACTGCACGAGGGTGGACCACCTGCTCTCGTGATCTGGAACATCAAG
CACTTGCTCCACACCGGCATTGGCACCGCCTCGCGACCCAGCGAGGTGTGCATGGTGGATGGTACGGACA
TGTGCTTGGCTGATTTCCATGCAGGCATTTTCCTTAAGGGGCAAGAACACGCTGTGTTCGCGTGTGTCAC
CTCCAACGGGTGGTACGCGATTGATGATGAGGACTTCTACCCCTGGACGCCGGACCCATCCGACGTTCTG
GTGTTTGTCCCGTACGATCAAGAACCACTCAACGGGGAATGGAAAGCCAAGGTTCAACGCAAGCTCAAAG
GGGCTGGACAATCCAGTCCAGCGACCGGCTCGCAGAACCAATCTGGCAATACTGGCAGCATAATAAACAA
CTACTACATGCAGCAGTATCAAAACTCCATGGACACACAGCTTGGTGACAACGCAATCAGTGGAGGCTCT
AACGAGGGCTCCACCGACACAACCTCCACCCACACAACCAACACCCAGAACAATGACTGGTTCTCCAAAC
TTGCAAGCTCTGCTTTCAGCGGTCTTTTCGGCGCTCTTCTCGCCGACAAGAAGACAGAGGAGACCACTCT
CCTCGAAGACCGCATCCTCACCACCCGTAACGGCCACACCACGTCGACAACCCAGTCAAGCGTTGGAGTC
ACATACGGGTACGCAACAGCTGAGGATTTTGTGAGCGGACCGAACACTTCTGGTCTCGAGACCAGAGTTG
TGCAGGCAGAACGGTTTTTCAAAACCCACCTCTTCGACTGGGTCACCAGTGACTCATTCGGACGTTGCCA
CCTCCTGGAACTCCCGACCGACCACAAAGGTGTCTACGGCAGCCTGACCGACTCGTATGCATATATGAGG
AACGGCTGGGATGTCGAGGTCACCGCGGTTGGCAACCAGTTCAACGGAGGGTGCCTGCTGGTCGCAATGG
TACCAGAGCTTTGTTCTATCCAAAAGAGGGAACTGTACCAGCTCACACTCTTCCCTCACCAGTTCATCAA
CCCACGCACGAACATGACTGCGCACATTACAGTGCCCTTTGTTGGCGTTAACCGCTACGACCAGTACAAG
GTTCACAAGCCTTGGACCCTTGTGGTTATGGTTGTAGCCCCTCTGACCGTCAACACTGAAGGTGCCCCTC
AGATCAAGGTGTATGCCAACATTGCCCCAACTAACGTGCACGTCGCGGGTGAGTTTCCTTCCAAAGAGGG
AATATTCCCCGTGGCCTGTAGCGACGGCTATGGTGGCCTGGTGACCACGGACCCGAAGACGGCTGACCCC
GTTTATGGGAAAGTGTTCAACCCCCCCCGCAACCAGTTGCCGGGGCGTTTTACCAACCTCCTTGATGTGG
CTGAGGCATGCCCGACGTTTCTGCACTTCGAGGGTGGCGTACCGTACGTGACCACGAAAACAGACTCGGA
CAGGGTGCTTGCTCAGTTTGATATGTCTTTGGCAGCAAAACACATGTCAAACACCTTCCTCGCAGGTCTT
GCGCAGTACTACACACAGTACAGTGGCACCATCAACCTGCACTTCATGTTCACAGGACCCACTGACGCGA
AGGCGCGTTACATGATTGCCTACGCCCCACCGGGCATGGAGCCGCCCAAGACACCTGAGGCGGCCGCGCA
CTGCATTCATGCTGAATGGGACACTGGGTTGAACTCAAAGTTTACTTTTTCCATCCCCTACCTCTCGGCC
GCCGATTACGCGTACACCGCGTCTGACGTGGCCGAGACCACAAATGTGCAGGGATGGGTTTGCTTGTTTC
AAATTACACATGGCAAGGCCGACGGCGACGCTCTGGTCGTACTGGCTAGTGCTGGTAAAGACTTTGAGCT
AAGGCTGCCGGTGGACGCCCGTGCGGAAACCACTTCTGCGGGCGAGTCAGCGGATCCTGTCACCACCACT
GTTGAAAACTACGGTGGCGAAACACAGATCCAGAGGCGCCAACACACGGACGTCTCGTTCATTATGGACA
GATTTGTGAAAGTGACACCGCAAAACCAAATTAACATTTTGGACCTCATGCAGGTCCCATCACACACTTT
GGTGGGAGCGCTCCTACGCGCGTCCACTTACTACTTCTCTGACTTGGAGATAGCAGTAAAACACGAGGGA
GACCTCACCTGGGTTCCAAATGGAGCGCCTGAAAAGGCGTTGGACAACACCACCAACCCAACTGCTTACC
ACAAGGCACCACTCACCCGGCTTGCCCTGCCCTACACTGCGCCCCACCGCGTGTTGGCAACCGTGTACAA
CGGTGAGTGCAGGTACAGCAGAAATGCTGTGCCCAACTTGAGAGGTGACCTTCAAGTGTTGGCTCAAAAG
GTGGCACGGACGCTGCCTACCTCCTTCAACTACGGTGCCATCAAAGCGACCCGGGTCACCGAGTTGCTTT
ACCGGATGAAGAGGGCCGAAACATACTGTCCAAGGCCCTTGCTGGCAATCCACCCAACTGAAGCCAGACA
CAAACAGAAAATTGTGGCACCGGTGAAACAGACTTTGAATTTTGACCTTCTGAAGTTGGCAGGAGACGTT
GAGTCCAACCCTGGGCCCTTCTTCTTCTCCGACGTTAGGTCGAACTTCTCCAAACTGGTGGAAACTATCA
ACCAGATGCAGGAGGACATGTCAACAAAACACGGGCCTGACTTTAACCGGTTAGTGTCCGCATTTGAGGA
ATTGGCCATTGGAGTGAAAGCCATCAGAACCGGTCTCGACGAGGCCAAACCCTGGTACAAGCTTATCAAG
CTCCTAAGCCGCCTGTCGTGCATGGCCGCTGTGGCAGCACGGTCCAAGGACCCAGTCCTTGTGGCCATCA
TGCTGGCCGACACCGGTCTCGAGATTCTGGACAGCACCTTCGTCGTGAAGAAGATCTCCGACTCGCTCTC
CAGTCTCTTTCACGTGCCGGCCCCCGTCTTCAGTTTCGGAGCACCGGTCCTGTTGGCCGGGTTGGTCAAA
GTCGCCTCGAGTTTCTTCCGGTCTACACCCGAAGACCTTGAGAGAGCAGAGAAACAGCTCAAAGCACGTG
ACATCAACGACATCTTCGCCATTCTCAAGAACGGCGAGTGGCTGGTCAAACTGATCCTTGCCATCCGCGA
CTGGATTAAGGCTTGGATCGCCTCAGAAGAGAAGTTTGTCACCATGACAGACTTGGTGCCTGGCATCCTT
GAAAAGCAGCGGGATCTGAACGACCCGAGCAAGTACAAGGAAGCCAAGGAGTGGCTCGACAACGCGCGCC
AAGCGTGTTTGAAGAGCGGGAACGTCCACATTGCCAACCTGTGTAAAGTGGTCGCTCCAGCACCCAGCAA
GTCGAGGCCCGAACCCGTGGTTGTTTGTCTCCGCGGCAAATCTGGCCAGGGCAAGAGCTTCCTTGCAAAC
GTGCTTGCACAGGCAATTTCCGCCCACTTCACCGGCAGAACCGACTCAGTGTGGTACTGCCCACCTGACC
CTGACCACTTCGACGGTTACAACCAGCAAACCGTCGTTGTGATGGATGATTTGGGCCAGAACCCTGACGG
CAAGGACTTCAAATACTTTGCCCAAATGGTCTCGACCACAGGGTTCATCCCGCCCATGGCATCACTCGAG
GACAAAGGTAAACCTTTCAACAGCAAAGTCATCATCGCGACCACCAACTTGTACTCGGGCTTCACCCCGA
GGACTATGGTGTGTCCCGACGCACTGAACCGGAGGTTTCACTTTGACATCGATGTGAGTGCTAAGGATGG
GTACAAAATTAACAACAAATTGGACATTATCAAAGCACTTGAAGACACCCACACCAACCCAGTGGCAATG
TTTCAATACGACTGTGCCCTTCTCAACGGCATGGCCGTTGAAATGAAGAGAATGCAACAAGACATGTTCA
AGCCTCAACCACCCCTCCAGAATGTGTACCAGCTTGTTCAGGAGGTGATTGATCGGGTCGAGCTCCATGA
GAAAGTGTCGAGCCACCCGATCTTCAAGCAGATCTCAATTCCTTCCCAAAAATCTGTGTTGTACTTTCTC
ATTGAGAAGGGCCAACATGAGGCAGCAATTGAATTCTTTGAGGGCATGGTCCACGACTCTATTAAGGAGG
AACTCCAACCCCTCCTCCAACAAACTTCATTTGTGAAACGCGCTTTCAAGCGCCTGAAGGAAAATTTTGA
GATTGTTGCTCTGTGTTTAACACTTTTGGCAAACATTGTGATCATGGTCCGTGAGACTCGCAAGAGGCAG
AAAATGGTGGATGATGCAGTGAATGAGTACATTGAGAAAGCAAACATCACCACAGATGACAAGACTCTTG
ACGAGGCGGAGAAGAGCCCTCTAGAGACCAGCGGCGCCAGCACCGTTGGCTTTAGAGAGAGAACTCTCCC
AGGTCAAAAGGCATGCGATGACGTGAACTCCGAGCCTGCCCAACCTGTTGAGGAGCAACCACAAGCTGAA
GGACCCTACGCCGGACCACTCGAGCGTCAGAAACCTCTGAAAGTGAGAGCCAAGCTCCCACAGCAGGAGG
GGCCTTACGCTGGTCCAATGGAGAGACAGAAACCGCTAAAAGTGAAAGCAAAAGCCCCGGTCGTGAAGGA
AGGACCTTACGAGGGACCGGTGAAGAAGCCTGTCGCTTTGAAAGTGAAAGCTAAGAACCTGATTGTCACT
GAGAGTGGTGCCCCACCGACCGACTTGCAAAAGATGGTCATGGGCAACACAAAGCCTGTTGAGCTCATCC
TCGACGGGAAGACAGTAGCCATTTGCTGCGCTACTGGAGTGTTTGGCACTGCTTACCTCGTGCCTCGTCA
CCTCTTCGCAGAGAAGTATGACAAGATCATGTTGGACGGCAGAGCCATGACAGACAGTGACTACAGAGTG
TTTGAGTTTGAGATCAAAGTAAAAGGACAGGACATGCTCTCAGACGCCGCGCTCATGGTGCTCCACCGTG
GGAACCGCGTGAGGGACATCACGAAGCACTTTCGTGACACAGCAAGAATGAAGAAAGGCACCCCCGTTGT
CGGTGTGATTAACAACGCCGATGTCGGGAGACTGATTTTCTCCGGTGAGGCCCTTACTTACAAGGACATT
GTGGTTTGTATGGACGGAGACACCATGCCCGGCCTCTTTGCCTACAGAGCCGCCACCAAGGCTGGCTACT
GCGGAGGAGCCGTTCTCGCCAAAGACGGAGCTGACACTTTCATCGTCGGCACTCACTCTGCAGGAGGCAA
CGGAGTTGGATACTGCTCATGCGTTTCCAGGTCCATGCTTCTTAAAATGAAGGCACACATTGACCCCGAA
CCACACCACGAGGGGTTGATTGTGGACACCAGAGATGTGGAAGAGCGCGTTCACGTGATGCGCAAAACCA
AGCTTGCACCCACCGTTGCACACGGTGTGTTCAACCCCGAGTTTGGGCCCGCTGCCTTGTCCAACAAGGA
CCCGCGTCTGAACGAGGGTGTTGTCCTCGATGAAGTCATCTTCTCCAAACACAAGGGAGACACAAAGATG
TCTGAGGAGGACAAAGCGCTGTTCCGCCGCTGTGCTGCTGACTACGCGTCACGCCTGCACAGCGTGTTGG
GCACAGCAAATGCCCCATTGAGCATCTACGAGGCAATCAAGGGTGTCGACGGACTCGACGCCATGGAACC
AGATACAGCGCCCGGCCTCCCCTGGGCCCTCCAGGGTAAACGCCGCGGCGCGCTCATCGACTTCGAAAAC
GGCACGGTCGGACCCGAAGTCGAGGCTGCCCTGAAGCTCATGGAGAAGAGAGAATACAAATTTGCTTGTC
AGACCTTCCTGAAGGACGAGATTCGCCCGATGGAGAAAGTACGTGCCGGCAAGACTCGCATTGTCGACGT
CTTGCCCGTTGAGCATATTCTTTACACCAGGATGATGATTGGCAGATTTTGTGCACAGATGCACTCAAAC
AACGGACCGCAAATTGGCTCAGCGGTCGGTTGCAACCCTGATGTTGATTGGCAGAGATTTGGCACACACT
TCGCCCAGTACAGAAACGTGTGGGATGTGGACTATTCGGCCTTTGATGCTAATCACTGCAGTGATGCCAT
GAACATCATGTTTGAGGAGGTGTTTCGCACGGAGTTCGGCTTCCACCCGAATGCCGAGTGGATCCTGAAG
ACTCTTGTGAACACGGAACACGCCTATGAGAACAAACGCATCACTGTTGAAGGCGGAATGCCGTCTGGTT
GTTCCGCAACAAGCATCATCAACACAATTTTGAACAACATCTACGTGCTCTACGCCCTGCGTAGACACTA
TGAGGGAGTTGAGCTGGACACATACACCATGATCTCCTACGGAGACGACATCGTGGTGGCAAGTGATTAT
GACTTGGACTTTGAGGCTCTCAAGCCCCACTTCAAATCCCTTGGTCAAACCATCACTCCAGCTGACAAAA
GCGACAAAGGTTTTGTTCTTGGTCACTCCATTACCGATGTCACTTTCCTCAAAAGACACTTCCACATGGA
CTATGGAACTGGGTTTTACAAACCTGTGATGGCCTCAAAGACCCTTGAGGCTATCCTCTCCTTTGCACGC
CGTGGGACCATACAGGAGAAGTTGATCTCCGTGGCAGGACTCGCCGTCCACTCTGGACCAGACGAGTACC
GGCGTCTCTTTGAGCCTTTCCAAGGTCTCTTTGAGATTCCAAGCTACAGATCACTTTACCTGCGTTGGGT
GAACGCCGTGTGTGGTGACGCATAATCCCTCAGAGGCCACGACAACCGGGCTCTGAGGCGCGCGACACCT
TAGGAGTGAAAGCCTGAAAGGGCTTTTCCCGCTTCCTTAATCTAAAAAAAAAAAAA
>IP4b
GGTCTCACCCCTAGTAAGCCAACGACAGTCCCTGCGTTGCACTCCACACTTACGTTGTACACACGCGGGA
CCCGATGGACTTTCGTTCACCCACCTACAGCTGGACTCACGGCACCGCGTGGCCATTTTAGCTGGATTGT
GCGGACGAACACTGCTTGCGCACCTCGCGTGACCAGTTAGTACTCTTACCACTCTCCGCCTACTTGGTCG
TTAGCGCTGTCTTGGGCACTCCTGTTGGGGGCCGTTCGACGCTCCACGGGCTCTCCTGTGTGACATCTAC
GGTGATGGGGCCGTTTCGCGCGTGCTGGTCGTCTGGACTGCTTCGGCTGTCACCCGACGCCCGCCNNNNN
CCCCCCCCCCCCNNNNNTTTACCGTCGTTCCCGACGTAAAAGGGAGGTAACCACAAGCTTGAAACCGTCC
AGCCCGACGAAAAAGGGTGGTAACCACAAGCTTACTGCCGTCTTTCCCGACGTTAAAGGGATGAAACCAC
AAGACTTACCTTCGCTCGGAAGTAAAACGACAAACACGCACAGTTTTGCCCGTTTTCATGAGAAATGGGA
CGTCTGCGCACGAAACGCGCCGTCGCTTGAGGAGGACTTGTACAAACACGATCTATGCAGGTTTCCCCAA
CTGACACAAACCGTGCAACTTGAAACTCCGCCTGGTCTTTCCAGGTCTAGAGGGGTAACATTTTGTACTG
TGTTTGACTCCACGCTCGATCCACTAGCGAGTGTTAGTAGCGGTACTGCTGTCTCGTAGCGGAGCATGTT
GGCCGTGGGAACACCTCCTTGGTAACAAGGACCCACGGGGCCGAAAGCCACGTCCTAACGGACCCAACAT
GTGTGCAACCCCAGCACGGCAGCTTTACTGTGAAACCCACTTCAAGGTGACATTGTTACTGGTACTCAAA
CACTGGTGACAGGCTAAGGATGCCCTTCAGGTACCCCGAGGTAACAAGCGACACTCGGGATCTGAGAAGG
GGACTGGGACTTCTTTAAAGTGCCCAGTTTAAAAAGCTTCTACGCCTGAATAGGTGACCGGAGGCCGGCA
CCTTTCCTTTTATAAACACTGAACACATGAATACAACTGACTGTTTTATCGCTTTGGTACAGGCTATCAG
AGAGATTAAAGCACTTTTCCTACCACGCACCACAGGAAAAATGGAACTGACACTGTACAACGGTGAGAAG
AAGACCTTTTACTCCAGGCCCAACAACCACGACAACTGCTGGTTGAACGCCATCCTCCAGTTGTTCAGGT
ACGTTGAAGAACCATTCTTCGACTGGGTCTACAGTTCGCCTGAGAACCTCACGCTTGAAGCCATCAAGCA
GTTGGAGGACCTCACAGGGCTTGAACTGCACGAGGGTGGACCACCTGCTCTCGTGATCTGGAACATCAAG
CACTTGCTCCACACCGGCATTGGCACCGCCTCGCGACCCAGCGAGGTGTGCATGGTGGATGGTACGGACA
TGTGCTTGGCTGATTTCCATGCAGGCATTTTCCTTAAGGGGCAAGAACACGCTGTGTTCGCGTGTGTCAC
CTCCAACGGGTGGTACGCGATTGATGATGAGGACTTCTACCCCTGGACGCCGGACCCATCCGACGTTCTG
GTGTTTGTCCCGTACGATCAAGAACCACTCAACGGGGAATGGAAAGCCAAGGTTCAACGCAAGCTCAAAG
GGGCTGGACAATCCAGTCCAGCGACCGGCTCGCAGAACCAATCTGGCAATACTGGCAGCATAATAAACAA
CTACTACATGCAGCAGTATCAAAACTCCATGGACACACAGCTTGGTGACAACGCAATCAGTGGAGGCTCT
AACGAGGGCTCCACCGACACAACCTCCACCCACACAACCAACACCCAGAACAATGACTGGTTCTCCAAAC
TTGCAAGCTCTGCTTTCAGCGGTCTTTTCGGCGCTCTTCTCGCCGACAAGAAGACAGAGGAGACCACTCT
CCTCGAAGACCGCATCCTCACCACCCGTAACGGCCACACCACGTCGACAACCCAGTCAAGCGTTGGAGTC
ACATACGGGTACGCAACAGCTGAGGATTTTGTGAGCGGACCGAACACTTCTGGTCTCGAGACCAGAGTTG
TGCAGGCAGAACGGTTTTTCAAAACCCACCTCTTCGACTGGGTCACCAGTGACTCATTCGGACGTTGCCA
CCTCCTGGAACTCCCGACCGACCACAAAGGTGTCTACGGCAGCCTGACCGACTCGTATGCATATATGAGG
AACGGCTGGGATGTCGAGGTCACCGCGGTTGGCAACCAGTTCAACGGAGGGTGCCTGCTGGTCGCAATGG
TACCAGAGCTTTGTTCTATCCAAAAGAGGGAACTGTACCAGCTCACACTCTTCCCTCACCAGTTCATCAA
CCCACGCACGAACATGACTGCGCACATTACAGTGCCCTTTGTTGGCGTTAACCGCTACGACCAGTACAAG
GTTCACAAGCCTTGGACCCTTGTGGTTATGGTTGTAGCCCCTCTGACCGTCAACACTGAAGGTGCCCCTC
AGATCAAGGTGTATGCCAACATTGCCCCAACTAACGTGCACGTCGCGGGTGAGTTTCCTTCCAAAGAGGG
AATATTCCCCGTGGCCTGTAGCGACGGCTATGGTGGCCTGGTGACCACGGACCCGAAGACGGCTGACCCC
GTTTATGGGAAAGTGTTCAACCCCCCCCGCAACCAGTTGCCGGGGCGTTTTACCAACCTCCTTGATGTGG
CTGAGGCATGCCCGACGTTTCTGCACTTCGAGGGTGGCGTACCGTACGTGACCACGAAAACAGACTCGGA
CAGGGTGCTTGCTCAGTTTGATATGTCTTTGGCAGCAAAACACATGTCAAACACCTTCCTCGCAGGTCTT
GCGCAGTACTACACACAGTACAGTGGCACCATCAACCTGCACTTCATGTTCACAGGACCCACTGACGCGA
AGGCGCGTTACATGATTGCCTACGCCCCACCGGGCATGGAGCCGCCCAAGACACCTGAGGCGGCCGCGCA
CTGCATTCATGCTGAATGGGACACTGGGTTGAACTCAAAGTTTACTTTTTCCATCCCCTACCTCTCGGCC
GCCGATTACGCGTACACCGCGTCTGACGTGGCCGAGACCACAAATGTGCAGGGATGGGTCTGCTTGTTTC
AAATTACACATGGCAAGGCCGACGGCGACGCTCTGGTCGTACTGGCTAGTGCTGGTAAAGACTTTGAGCT
AAGGCTGCCGGTGGACGCCCGTGCGGAAACCACTTCTGCGGGCGAGTCAGCGGATCCTGTCACCACCACT
GTTGAAAACTACGGTGGCGAAACACAGATCCAGAGGCGCCAACACACGGACGTCTCGTTCATTATGGACA
GATTTGTGAAAGTGACACCGCAAAACCAAATTAACATTTTGGACCTCATGCAGGTCCCATCACACACTTT
GGTGGGAGCGCTCCTACGCGCGTCCACTTACTACTTCTCTGACTTGGAGATAGCAGTAAAACACGAGGGA
GACCTCACCTGGGTTCCAAATGGAGCGCCTGAAAAGGCGTTGGACAACACCACCAACCCAACTGCTTACC
ACAAGGCACCACTCACCCGGCTTGCCCTGCCCTACACTGCGCCCCACCGCGTGTTGGCAACCGTGTACAA
CGGTGAGTGCAGGTACAGCAGAAATGCTGTGCCCAACTTGAGAGGTGACCTTCAAGTGTTGGCTCAAAAG
GTGGCACGGACGCTGCCTACCTCCTTCAACTACGGTGCCATCAAAGCGACCCGGGTCACCGAGTTGCTTT
ACCGGATGAAGAGGGCCGAAACATACTGTCCAAGGCCCTTGCTGGCAATCCACCCAACTGAAGCCAGACA
CAAACAGAAAATTGTGGCACCGGTGAAACAGACTTTGAATTTTGACCTTCTGAAGTTGGCAGGAGACGTT
GAGTCCAACCCTGGGCCCTTCTTCTTCTCCGACGTTAGGTCGAACTTCTCCAAACTGGTGGAAACTATCA
ACCAGATGCAGGAGGACATGTCAACAAAACACGGGCCTGACTTTAACCGGTTAGTGTCCGCATTTGAGGA
ATTGGCCATTGGAGTGAAAGCCATCAGAACCGGTCTCGACGAGGCCAAACCCTGGTACAAGCTTATCAAG
CTCCTAAGCCGCCTGTCGTGCATGGCCGCTGTGGCAGCACGGTCCAAGGACCCAGTCCTTGTGGCCATCA
TGCTGGCCGACACCGGTCTCGAGATTCTGGACAGCACCTTCGTCGTGAAGAAGATCTCCGACTCGCTCTC
CAGTCTCTTTCACGTGCCGGCCCCCGTCTTCAGTTTCGGAGCACCGGTCCTGTTGGCCGGGTTGGTCAAA
GTCGCCTCGAGTTTCTTCCGGTCTACACCCGAAGACCTTGAGAGAGCAGAGAAACAGCTCAAAGCACGTG
ACATCAACGACATCTTCGCCATTCTCAAGAACGGCGAGTGGCTGGTCAAACTGATCCTTGCCATCCGCGA
CTGGATTAAGGCTTGGATCGCCTCAGAAGAGAAGTTTGTCACCATGACAGACTTGGTGCCTGGCATCCTT
GAAAAGCAGCGGGATCTGAACGACCCGAGCAAGTACAAGGAAGCCAAGGAGTGGCTCGACAACGCGCGCC
AAGCGTGTTTGAAGAGCGGGAACGTCCACATTGCCAACCTGTGTAAAGTGGTCGCTCCAGCACCCAGCAA
GTCGAGGCCCGAACCCGTGGTTGTTTGTCTCCGCGGCAAATCTGGCCAGGGCAAGAGCTTCCTTGCAAAC
GTGCTTGCACAGGCAATTTCCGCCCACTTCACCGGCAGAACCGACTCAGTGTGGTACTGCCCACCTGACC
CTGACCACTTCGACGGTTACAACCAGCAAACCGTCGTTGTGATGGATGATTTGGGCCAGAACCCTGACGG
CAAGGACTTCAAATACTTTGCCCAAATGGTCTCGACCACAGGGTTCATCCCGCCCATGGCATCACTCGAG
GACAAAGGTAAACCTTTCAACAGCAAAGTCATCATCGCGACCACCAACTTGTACTCGGGCTTCACCCCGA
GGACTATGGTGTGTCCCGACGCACTGAACCGGAGGTTTCACTTTGACATCGATGTGAGTGCTAAGGATGG
GTACAAAATTAACAACAAATTGGACATTATCAAAGCACTTGAAGACACCCACACCAACCCAGTGGCAATG
TTTCAATACGACTGTGCCCTTCTCAACGGCATGGCCGTTGAAATGAAGAGAATGCAACAAGACATGTTCA
AGCCTCAACCACCCCTCCAGAATGTGTACCAGCTTGTTCAGGAGGTGATTGATCGGGTCGAGCTCCATGA
GAAAGTGTCGAGCCACCCGATCTTCAAGCAGATCTCAATTCCTTCCCAAAAATCTGTGTTGTACTTTCTC
ATTGAGAAGGGCCAACATGAGGCAGCAATTGAATTCTTTGAGGGCATGGTCCACGACTCTATTAAGGAGG
AACTCCAACCCCTCCTCCAACAAACTTCATTTGTGAAACGCGCTTTCAAGCGCCTGAAGGAAAATTTTGA
GATTGTTGCTCTGTGTTTAACACTTTTGGCAAACATTGTGATCATGGTCCGTGAGACTCGCAAGAGGCAG
AAAATGGTGGATGATGCAGTGAATGAGTACATTGAGAAAGCAAACATCACCACAGATGACAAGACTCTTG
ACGAGGCGGAGAAGAGCCCTCTAGAGACCAGCGGCGCCAGCACCGTTGGCTTTAGAGAGAGAACTCTCCC
AGGTCAAAAGGCATGCGATGACGTGAACTCCGAGCCTGCCCAACCTGTTGAGGAGCAACCACAAGCTGAA
GGACCCTACGCCGGACCACTCGAGCGTCAGAAACCTCTGAAAGTGAGAGCCAAGCTCCCACAGCAGGAGG
GGCCTTACGCTGGTCCAATGGAGAGACAGAAACCGCTAAAAGTGAAAGCAAAAGCCCCGGTCGTGAAGGA
AGGACCTTACGAGGGACCGGTGAAGAAGCCTGTCGCTTTGAAAGTGAAAGCTAAGAACCTGATTGTCACT
GAGAGTGGTGCCCCACCGACCGACTTGCAAAAGATGGTCATGGGCAACACAAAGCCTGTTGAGCTCATCC
TCGACGGGAAGACAGTAGCCATTTGCTGCGCTACTGGAGTGTTTGGCACTGCTTACCTCGTGCCTCGTCA
CCTCTTCGCAGAGAAGTATGACAAGATCATGTTGGACGGCAGAGCCATGACAGACAGTGACTACAGAGTG
TTTGAGTTTGAGATCAAAGTAAAAGGACAGGACATGCTCTCAGACGCCGCGCTCATGGTGCTCCACCGTG
GGAACCGCGTGAGGGACATCACGAAGCACTTTCGTGACACAGCAAGAATGAAGAAAGGCACCCCCGTTGT
CGGTGTGATTAACAACGCCGATGTCGGGAGACTGATTTTCTCCGGTGAGGCCCTTACTTACAAGGACATT
GTGGTTTGTATGGACGGAGACACCATGCCCGGCCTCTTTGCCTACAGAGCCGCCACCAAGGCTGGCTACT
GCGGAGGAGCCGTTCTCGCCAAAGACGGAGCTGACACTTTCATCGTCGGCACTCACTCTGCAGGAGGCAA
CGGAGTTGGATACTGCTCATGCGTTTCCAGGTCCATGCTTCTTAAAATGAAGGCACACATTGACCCCGAA
CCACACCACGAGGGGTTGATTGTGGACACCAGAGATGTGGAAGAGCGCGTTCACGTGATGCGCAAAACCA
AGCTTGCACCCACCGTTGCACACGGTGTGTTCAACCCCGAGTTTGGGCCCGCTGCCTTGTCCAACAAGGA
CCCGCGTCTGAACGAGGGTGTTGTCCTCGATGAAGTCATCTTCTCCAAACACAAGGGAGACACAAAGATG
TCTGAGGAGGACAAAGCGCTGTTCCGCCGCTGTGCTGCTGACTACGCGTCACGCCTGCACAGCGTGTTGG
GCACAGCAAATGCCCCATTGAGCATCTACGAGGCAATCAAGGGTGTCGACGGACTCGACGCCATGGAACC
AGATACAGCGCCCGGCCTCCCCTGGGCCCTCCAGGGTAAACGCCGCGGCGCGCTCATCGACTTCGAAAAC
GGCACGGTCGGACCCGAAGTCGAGGCTGCCCTGAAGCTCATGGAGAAGAGAGAATACAAATTTGCTTGTC
AGACCTTCCTGAAGGACGAGATTCGCCCGATGGAGAAAGTACGTGCCGGCAAGACTCGCATTGTCGACGT
CTTGCCCGTTGAGCATATTCTTTACACCAGGATGATGATTGGCAGATTTTGTGCACAGATGCACTCAAAC
AACGGACCGCAAATTGGCTCAGCGGTCGGTTGCAACCCTGATGTTGATTGGCAGAGATTTGGCACACACT
TCGCCCAGTACAGAAACGTGTGGGATGTGGACTATTCGGCCTTTGATGCTAATCACTGCAGTGATGCCAT
GAACATCATGTTTGAGGAGGTGTTTCGCACGGAGTTCGGCTTCCACCCGAATGCCGAGTGGATCCTGAAG
ACTCTTGTGAACACGGAACACGCCTATGAGAACAAACGCATCACTGTTGAAGGCGGAATGCCGTCTGGTT
GTTCCGCAACAAGCATCATCAACACAATTTTGAACAACATCTACGTGCTCTACGCCCTGCGTAGACACTA
TGAGGGAGTTGAGCTGGACACATACACCATGATCTCCTACGGAGACGACATCGTGGTGGCAAGTGATTAT
GACTTGGACTTTGAGGCTCTCAAGCCCCACTTCAAATCCCTTGGTCAAACCATCACTCCAGCTGACAAAA
GCGACAAAGGTTTTGTTCTTGGTCACTCCATTACCGATGTCACTTTCCTCAAAAGACACTTCCACATGGA
CTATGGAACTGGGTTTTACAAACCTGTGATGGCCTCAAAGACCCTTGAGGCTATCCTCTCCTTTGCACGC
CGTGGGACCATACAGGAGAAGTTGATCTCCGTGGCAGGACTCGCCGTCCACTCTGGACCAGACGAGTACC
GGCGTCTCTTTGAGCCTTTCCAAGGTCTCTTTGAGATTCCAAGCTACAGATCACTTTACCTGCGTTGGGT
GAACGCCGTGTGTGGTGACGCATAATCCCTCAGAGGCCACGACAACCGGGCTCTGAGGCGCGCGACACCT
TAGGAGTGAAAGCCTGAAAGGGCTTTTCCCGCTTCCTTAATCTAAAAAAAAAAAAA
>IP5
GGTCTCACCCCTAGTAAGCCAACGACAGTCCCTGCGTTGCACTCCACACTTACGTTGTACACACGCGGGA
CCCGATGGACTTTCGTTCACCCACCTACAGCTGGACTCACGGCACCGCGTGGCCATTTTAGCTGGATTGT
GCGGACGAACACTGCTTGCGCACCTCGCGTGACCAGTTAGTACTCTTACCACTCTCCGCCTACTTGGTCG
TTAGCGCTGTCTTGGGCACTCCTGTTGGGGGCCGTTCGACGCTCCACGGGCTCTCCTGTGTGACATCTAC
GGTGATGGGGCCGTTTCGCGCGTGCTGGTCGTCTGGACTGCTTCGGCTGTCACCCGACGCCCGCCNNNNN
CCCCCCCCCCCCNNNNNTTTACCGTCGTTCCCGACGTAAAAGGGAGGTAACCACAAGCTTGAAACCGTCC
AGCCCGACGAAAAAGGGTGGTAACCACAAGCTTACTGCCGTCTTTCCCGACGTTAAAGGGATGAAACCAC
AAGACTTACCTTCGCTCGGAAGTAAAACGACAAACACGCACAGTTTTGCCCGTTTTCATGAGAAATGGGA
CGTCTGCGCACGAAACGCGCCGTCGCTTGAGGAGGACTTGTACAAACACGATCTATGCAGGTTTCCCCAA
CTGACACAAACCGTGCAACTTGAAACTCCGCCTGGTCTTTCCAGGTCTAGAGGGGTAACATTTTGTACTG
TGTTTGACTCCACGCTCGATCCACTAGCGAGTGTTAGTAGCGGTACTGCTGTCTCGTAGCGGAGCATGTT
GGCCGTGGGAACACCTCCTTGGTAACAAGGACCCACGGGGCCGAAAGCCACGTCCTAACGGACCCAACAT
GTGTGCAACCCCAGCACGGCAGCTTTACTGTGAAACCCACTTCAAGGTGACATTGATACTGGTACTCAAA
CACTGGTGACAGGCTAAGGATGCCCTTCAGGTACCCCGAGGTAACAAGCGACACTCGGGATCTGAGAAGG
GGACTGGGACTTCTTTAAAGTGCCCAGTTTAAAAAGCTTCTACGCCTGAATAGGTGACCGGAGGCCGGCA
CCTTTCCTTTTATAAACACTGAACACATGAATACAACTGACTGTTTTATCGCTTTGGTACAGGCTATCAG
AGAGATTAAAGCACTTTTCCTACCACGCACCACAGGAAAAATGGAACTGACACTGTACAACGGTGAGAAG
AAGACCTTTTACTCCAGGCCCAACAACCACGACAACTGCTGGTTGAACGCCATCCTCCAGTTGTTCAGGT
ACGTTGAAGAACCATTCTTCGACTGGGTCTACAGTTCGCCTGAGAACCTCACGCTTGAAGCCATCAAGCA
GTTGGAGGACCTCACAGGGCTTGAACTGCACGAGGGTGGACCACCTGCTCTCGTGATCTGGAACATCAAG
CACTTGCTCCACACCGGCATTGGCACCGCCTCGCGACCCAGCGAGGTGTGCATGGTGGATGGTACGGACA
TGTGCTTGGCTGATTTCCATGCAGGCATTTTCCTTAAGGGGCAAGAACACGCTGTGTTCGCGTGTGTCAC
CTCCAACGGGTGGTACGCGATTGATGATGAGGACTTCTACCCCTGGACGCCGGACCCATCCGACGTTCTG
GTGTTTGTCCCGTACGATCAAGAACCACTCAACGGGGAATGGAAAGCCAAGGTTCAACGCAAGCTCAAAG
GGGCTGGACAATCCAGTCCAGCGACCGGCTCGCAGAACCAATCTGGCAATACTGGCAGCATAATAAACAA
CTACTACATGCAGCAGTATCAAAACTCCATGGACACACAGCTTGGTGACAACGCAATCAGTGGAGGCTCT
AACGAGGGCTCCACCGACACAACCTCCACCCACACAACCAACACCCAGAACAATGACTGGTTCTCCAAAC
TTGCAAGCTCTGCTTTCAGCGGTCTTTTCGGCGCTCTTCTCGCCGACAAGAAGACAGAGGAGACCACTCT
CCTCGAAGACCGCATCCTCACCACCCGTAACGGCCACACCACGTCGACAACCCAGTCAAGCGTTGGAGTC
ACATACGGGTACGCAACAGCTGAGGATTTTGTGAGCGGACCGAACACTTCTGGTCTCGAGACCAGAGTTG
TGCAGGCAGAACGGTTTTTCAAAACCCACCTCTTCGACTGGGTCACCAGTGACTCATTCGGACGTTGCCA
CCTCCTGGAACTCCCGACCGACCACAAAGGTGTCTACGGCAGCCTGACCGACTCGTATGCATATATGAGG
AACGGCTGGGATGTCGAGGTCACCGCGGTTGGCAACCAGTTCAACGGAGGGTGCCTGCTGGTCGCAATGG
TACCAGAGCTTTGTTCTATCCAAAAGAGGGAACTGTACCAGCTCACACTCTTCCCTCACCAGTTCATCAA
CCCACGCACGAACATGACTGCGCACATTACAGTGCCCTTTGTTGGCGTTAACCGCTACGACCAGTACAAG
GTTCACAAGCCTTGGACCCTTGTGGTTATGGTTGTAGCCCCTCTGACCGTCAACACTGAAGGTGCCCCTC
AGATCAAGGTGTATGCCAACATTGCCCCAACTAACGTGCACGTCGCGGGTGAGTTTCCTTCCAAAGAGGG
AATATTCCCCGTGGCCTGTAGCGACGGCTATGGTGGCCTGGTGACCACGGACCCGAAGACGGCTGACCCC
GTTTATGGGAAAGTGTTCAACCCCCCCCGCAACCAGTTGCCGGGGCGTTTTACCAACCTCCTTGATGTGG
CTGAGGCATGCCCGACGTTTCTGCACTTCGAGGGTGACGTACCGTACGTGACCACGAAAACAGACTCGGA
CAGGGTGCTTGCTCAGTTTGATATGTCTTTGGCAGCAAAACACATGTCAAACACCTTCCTCGCAGGTCTT
GCGCAGTACTACACACAGTACAGTGGCACCATCAACCTGCACTTCATGTTCACAGGACCCACTGACGCGA
AGGCGCGTTACATGATTGCCTACGCCCCACCGGGCATGGAGCCGCCCAAGACACCTGAGGCGGCCGCGCA
CTGCATTCATGCTGAATGGGACACTGGGTTGAACTCAAAGTTTACTTTTTCCATCCCCTACCTCTCGGCC
GCCGATTACGCGTACACCGCGTCTGACGTGGCCGAGACCACAAATGTGCAGGGATGGGTCTGCTTGTTTC
AAATTACACATGGCAAGGCCGACGGCGACGCTCTGGTCGTACTGGCTAGTGCTGGTAAAGACTTTGAGCT
AAGGCTGCCGGTGGACGCCCGTGCGGAAACCACTTCTGCGGGCGAGTCAGCGGATCCTGTCACCACCACT
GTTGAAAACTACGGTGGCGAAACACAGATCCAGAGGCGCCAACACACGGACGTCTCGTTCATTATGGACA
GATTTGTGAAAGTGACACCGCAAAACCAAATTAACATTTTGGACCTCATGCAGGTCCCATCACACACTTT
GGTGGGAGCGCTCCTACGCGCGTCCACTTACTACTTCTCTGACTTGGAGATAGCAGTAAAACACGAGGGA
GACCTCACCTGGGTTCCAAATGGAGCGCCTGAAAAGGCGTTGGACAACACCACCAACCCAACTGCTTACC
ACAAGGCACCACTCACCCGGCTTGCCCTGCCCTACACTGCGCCCCACCGCGTGTTGGCAACCGTGTACAA
CGGTGAGTGCAGGTACAGCAGAAATGCTGTGCCCAACTTGAGAGGTGACCTTCAAGTGTTGGCTCAAAAG
GTGGCACGGACGCTGCCTACCTCCTTCAACTACGGTGCCATCAAAGCGACCCGGGTCACCGAGTTGCTTT
ACCGGATGAAGAGGGCCGAAACATACTGTCCAAGGCCCTTGCTGGCAATCCACCCAACTGAAGCCAGACA
CAAACAGAAAATTGTGGCACCGGTGAAACAGACTTTGAATTTTGACCTTCTGAAGTTGGCAGGAGACGTT
GAGTCCAACCCTGGGCCCTTCTTCTTCTCCGACGTTAGGTCGAACTTCTCCAAACTGGTGGAAACTATCA
ACCAGATGCAGGAGGACATGTCAACAAAACACGGGCCTGACTTTAACCGGTTAGTGTCCGCATTTGAGGA
ATTGGCCATTGGAGTGAAAGCCATCAGAACCGGTCTCGACGAGGCCAAACCCTGGTACAAGCTTATCAAG
CTCCTAAGCCGCCTGTCGTGCATGGCCGCTGTGGCAGCACGGTCCAAGGACCCAGTCCTTGTGGCCATCA
TGCTGGCCGACACCGGTCTCGAGATTCTGGACAGCACCTTCGTCGTGAAGAAGATCTCCGACTCGCTCTC
CAGTCTCTTTCACGTGCCGGCCCCCGTCTTCAGTTTCGGAGCACCGGTCCTGTTGGCCGGGTTGGTCAAA
GTCGCCTCGAGTTTCTTCCGGTCTACACCCGAAGACCTTGAGAGAGCAGAGAAACAGCTCAAAGCACGTG
ACATCAACGACATCTTCGCCATTCTCAAGAACGGCGAGTGGCTGGTCAAACTGATCCTTGCCATCCGCGA
CTGGATTAAGGCTTGGATCGCCTCAGAAGAGAAGTTTGTCACCATGACAGACTTGGTGCCTGGCATCCTT
GAAAAGCAGCGGGATCTGAACGACCCGAGCAAGTACAAGGAAGCCAAGGAGTGGCTCGACAACGCGCGCC
AAGCGTGTTTGAAGAGCGGGAACGTCCACATTGCCAACCTGTGTAAAGTGGTCGCTCCAGCACCCAGCAA
GTCGAGGCCCGAACCCGTGGTTGTTTGTCTCCGCGGCAAATCTGGCCAGGGCAAGAGCTTCCTTGCAAAC
GTGCTTGCACAGGCAATTTCCGCCCACTTCACCGGCAGAACCGACTCAGTGTGGTACTGCCCACCTGACC
CTGACCACTTCGACGGTTACAACCAGCAAACCGTCGTTGTGATGGATGATTTGGGCCAGAACCCTGACGG
CAAGGACTTTAAATACTTTGCCCAAATGGTCTCGACCACAGGGTTCATCCCGCCCATGGCATCACTCGAG
GACAAAGGTAAACCTTTCAACAGCAAAGTCATCATCGCGACCACCAACTTGTACTCGGGCTTCACCCCGA
GGACTATGGTGTGTCCCGACGCACTGAACCGGAGGTTTCACTTTGACATCGATGTGAGTGCTAAGGATGG
GTACAAAATTAACAACAAATTGGAYATTATCAAAGCACTTGAAGACACCCACACCAACCCAGTGGCAATG
TTTCAATACGACTGTGCCCTTCTCAACGGCATGGCCGTTGAAATGAAGAGAATGCAACAAGACATGTTCA
AGCCTCAACCACCCCTCCAGAATGTGTACCAGCTTGTTCAGGAGGTGATTGATCGGGTCGAGCTCCATGA
GAAAGTGTCGAGCCACCCGATCTTCAAGCAGATCTCAATTCCTTCCCAAAAATCTGTGTTGTACTTTCTC
ATTGAGAAGGGCCAACATGAGGCAGCAATTGAATTCTTTGAGGGCATGGTCCACGACTCTATTAAGGAGG
AACTCCAACCCCTCCTCCAACAAACTTCATTTGTGAAACGCGCTTTCAAGCGCCTGAAGGAAAATTTTGA
GATTGTTGCTCTGTGTTTAACACTTTTGGCAAACATTGTGATCATGGTCCGTGAGACTCGCAAGAGGCAG
AAAATGGTGGATGATGCAGTGAATGAGTACATTGAGAAAGCAAACATCACCACAGATGACAAGACTCTTG
ACGAGGCGGAGAAGAGCCCTCTAGAGACCAGCGGCGCCAGCACCGTTGGCTTTAGAGAGAGAACTCTCCC
AGGTCAAAAGGCATGCGATGACGTGAACTCCGAGCCTGCCCAACCTGTTGAGGAGCAACCACAAGCTGAA
GGACCCTACGCCGGACCACTCGAGCGTCAGAAACCTCTGAAAGTGAGAGCCAAGCTCCCACAGCAGGAGG
GGCCTTACGCTGGTCCAATGGAGAGACAGAAACCGCTAAAAGTGAAAGCAAAAGCCCCGGTCGTGAAGGA
AGGACCTTACGAGGGACCGGTGAAGAAGCCTGTCGCTTTGAAAGTGAAAGCTAAGAACCTGATTGTCACT
GAGAGTGGTGCCCCACCGACCGACTTGCAAAAGATGGTCATGGGCAACACAAAGCCTGTTGAGCTCATCC
TCGACGGGAAGACAGTAGCCATTTGCTGCGCTACTGGAGTGTTTGGCACTGCTTACCTCGTGCCTCGTCA
CCTCTTCGCAGAGAAGTATGACAAGATCATGTTGGACGGCAGAGCCATGACAGACAGTGACTACAGAGTG
TTTGAGTTTGAGATCAAAGTAAAAGGACAGGACATGCTCTCAGACGCCGCGCTCATGGTGCTCCACCGTG
GGAACCGCGTGAGGGACATCACGAAGCACTTTCGTGACACAGCAAGAATGAAGAAAGGCACCCCCGTTGT
CGGTGTGATTAACAACGCCGATGTCGGGAGACTGATTTTCTCCGGTGAGGCCCTTACTTACAAGGACATT
GTGGTTTGTATGGACGGAGACACCATGCCCGGCCTCTTTGCCTACAGAGCCGCCACCAAGGCTGGCTACT
GCGGAGGAGCCGTTCTCGCCAAAGACGGAGCTGACACTTTCATCGTCGGCACTCACTCTGCAGGAGGCAA
CGGAGTTGGATACTGCTCATGCGTTTCCAGGTCCATGCTTCTTAAAATGAAGGCACACATTGACCCCGAA
CCACATCACGAGGGGTTGATTGTGGACACCAGAGATGTGGAAGAGCGCGTTCACGTGATGCGCAAAACCA
AGCTTGCACCCACCGTTGCACACGGTGTGTTCAACCCCGAGTTTGGGCCCGCTGCCTTGTCCAACAAGGA
CCCGCGTCTGAACGAGGGTGTTGTCCTCGATGAAGTCATCTTCTCCAAACACAAGGGAGACACAAAGATG
TCTGAGGAGGACAAAGCGCTGTTCCGCCGCTGTGCTGCTGACTACGCGTCACGCCTGCACAGCGTGTTGG
GCACAGCAAATGCCCCATTGAGCATCTACGAGGCAATCAAGGGTGTCGACGGACTCGACGCCATGGAACC
AGATACAGCGCCCGGCCTCCCCTGGGCCCTCCAGGGTAAACGCCGCGGCGCGCTCATCGACTTCGAAAAC
GGCACGGTCGGACCCGAAGTCGAGGCTGCCCTGAAGCTCATGGAGAAGAGAGAATACAAATTTGCTTGTC
AGACCTTCCTGAAGGACGAGATTCGCCCGATGGAGAAAGTACGTGCCGGCAAGACTCGCATTGTCGACGT
CTTGCCCGTTGAGCATATTCTTTACACCAGGATGATGATTGGCAGATTTTGTGCACAGATGCACTCAAAC
AACGGACCGCAAATTGGCTCAGCGGTCGGTTGCAACCCTGATGTTGATTGGCAGAGATTTGGCACACACT
TCGCCCAGTACAGAAACGTGTGGGATGTGGACTATTCGGCCTTTGATGCTAATCACTGCAGTGATGCCAT
GAACATCATGTTTGAGGAGGTGTTTCGCACGGAGTTCGGCTTCCACCCGAATGCCGAGTGGATCCTGAAG
ACTCTTGTGAACACGGAACACGCCTATGAGAACAAACGCATCACTGTTGAAGGCGGAATGCCGTCTGGTT
GTTCCGCAACAAGCATCATCAACACAATTTTGAACAACATCTACGTGCTCTACGCCCTGCGTAGACACTA
TGAGGGAGTTGAGCTGGACACATACACCATGATCTCCTACGGAGACGACATCGTGGTGGCAAGTGATTAT
GACTTGGACTTCGAGGCTCTCAAGCCCCACTTTAAATCCCTTGGTCAAACCATCACTCCAGCTGACAAAA
GCGACAAAGGTTTTGTTCTTGGTCACTCCATTACCGATGTCACTTTCCTCAAAAGACACTTCCACATGGA
CTATGGAACTGGGTTTTACAAACCTGTGATGGCCTCAAAGACCCTTGAGGCTATCCTCTCCTTTGCACGC
CGTGGGACCATACAGGAGAAGTTGATCTCCGTGGCAGGACTCGCCGTCCACTCTGGACCAGACGAGTACC
GGCGTCTCTTTGAGCCTTTCCAAGGTCTCTTTGAGATTCCAAGCTACAGATCACTTTACCTGCGTTGGGT
GAACGCCGTGTGTGGTGACGCATAATCCCTCAGAGGCCACGACAACCGGGCTCTGAGGCGCGCGACACCT
TAGGAGTGAAAGCCTGAAAGGGCTTTTCCCGCTTCCTTGATCTAAAAAAAAAAAAA
>IP6b
GGTCTCACCCCTAGTAAGCCAACGACAGTCCCTGCGTTGCACTCCACACTTACGTTGTACACACGCGGGA
CCCGATGGACTTTCGTTCACCCACCTACAGCTGGACTCACGGCACCGCGTGGCCATTTTAGCTGGATTGT
GCGGACGAACACTGCTTGCGCACCTCGCGTGACCAGTTAGTACTCTTACCACTCTCCGCCTACTTGGTCG
TTAGCGCTGTCTTGGGCACTCCTGTTGGGGGCCGTTCGACGCTCCACGGGCTCTCCTGTGTGACATCTAC
GGTGATGGGGCCGTTTCGCGCGTGCTGGTCGTCTGGACTGCTTCGGCTGTCACCCGACGCCCGCCNNNNN
CCCCCCCCCCCCNNNNNTTTACCGTCGTTCCCGACGTAAAAGGGAGGTAACCACAAGCTTGAAACCGTCC
AGCCCGACGAAAAAGGGTGGTAACCACAAGCTTACTGCCGTCTTTCCCGACGTTAAAGGGATGAAACCAC
AAGACTTACCTTCGCTCGGAAGTAAAACGACAAACACGCACAGTTTTGCCCGTTTTCATGAGAAATGGGA
CGTCTGCGCACGAAACGCGCCGTCGCTTGAGGAGGACTTGTACAAACACGATCTATGCAGGTTTCCCCAA
CTGACACAAACCGTGCAACTTGAAACTCCGCCTGGTCTTTCCAGGTCTAGAGGGGTAACATTTTGTACTG
TGTTTGACTCCACGCTCGATCCACTAGCGAGTGTTAGTAGCGGTACTGCTGTCTCGTAGCGGAGCATGTT
GGCCGTGGGAACACCTCCTTGGTAACAAGGACCCACGGGGCCGAAAGCCACGTCCTAACGGACCCAACAT
GTGTGCAACCCCAGCACGGCAGCTTTACTGTGAAACCCACTTCAAGGTGACATTGTTACTGGTACTCAAA
CACTGGTGACAGGCTAAGGATGCCCTTCAGGTACCCCGAGGTAACAAGCGACACTCGGGATCTGAGAAGG
GGACTGGGACTTCTTTAAAGTGCCCAGTTTAAAAAGCTTCTACGCCTGAATAGGTGACCGGAGGCCGGCA
CCTTTCCTTTTATAAACACTGAACACATGAATACAACTGACTGTTTTATCGCTTTGGTACAGGCTATCAG
AGAGATTAAAGCACTTTTCCTACCACGCACCACAGGAAAAATGGAACTGACACTGTACAACGGTGAGAAG
AAGACCTTTTACTCCAGGCCCAACAACCACGACAACTGCTGGTTGAACGCCATCCTCCAGTTGTTCAGGT
ACGTTGAAGAACCATTCTTCGACTGGGTCTACAGTTCGCCTGAGAACCTCACGCTTGAAGCCATCAAGCA
GTTGGAGGACCTCACAGGGCTTGAACTGCACGAGGGTGGACCACCTGCTCTCGTGATCTGGAACATCAAG
CACTTGCTCCACACCGGCATTGGCACCGCCTCGCGACCCAGCGAGGTGTGCATGGTGGATGGTACGGACA
TGTGCTTGGCTGATTTCCATGCAGGCATTTTCCTTAAGGGGCAAGAACACGCTGTGTTCGCGTGTGTCAC
CTCCAACGGGTGGTACGCGATTGATGATGAGGACTTCTACCCCTGGACGCCGGACCCATCCGACGTTCTG
GTGTTTGTCCCGTACGATCAAGAACCACTCAACGGGGAATGGAAAGCCAAGGTTCAACGCAAGCTCAAAG
GGGCTGGACAATCCAGTCCAGCGACCGGCTCGCAGAACCAATCTGGCAATACTGGCAGCATAATAAACAA
CTACTACATGCAGCAGTATCAAAACTCCATGGACACACAGCTTGGTGACAACGCAATCAGTGGAGGCTCT
AACGAGGGCTCCACCGACACAACCTCCACCCACACAACCAACACCCAGAACAATGACTGGTTCTCCAAAC
TTGCAAGCTCTGCTTTCAGCGGTCTTTTCGGCGCTCTTCTCGCCGACAAGAAGACAGAGGAGACCACTCT
CCTCGAAGACCGCATCCTCACCACCCGTAACGGCCACACCACGTCGACAACCCAGTCAAGCGTTGGAGTC
ACATACGGGTACGCAACAGCTGAGGATTTTGTGAGCGGACCGAACACTTCTGGTCTCGAGACCAGAGTTG
TGCAGGCAGAACGGTTTTTCAAAACCCACCTCTTCGACTGGGTCACCAGTGACTCATTCGGACGTTGCCA
CCTCCTGGAACTCCCGACCGACCACAAAGGTGTCTACGGCAGCCTGACCGACTCGTATGCATATATGAGG
AACGGCTGGGATGTCGAGGTCACCGCGGTTGGCAACCAGTTCAACGGAGGGTGCCTGCTGGTCGCAATGG
TACCAGAGCTTTGTTCTATCCAAAAGAGGGAACTGTACCAGCTCACACTCTTCCCTCACCAGTTCATCAA
CCCACGCACGAACATGACTGCGCACATTACAGTGCCCTTTGTTGGCGTTAACCGCTACGACCAGTACAAG
GTTCACAAGCCTTGGACCCTTGTGGTTATGGTTGTAGCCCCTCTGACCGTCAACACTGAAGGTGCCCCTC
AGATCAAGGTGTATGCCAACATTGCCCCAACTAACGTGCACGTCGCGGGTGAGTTTCCTTCCAAAGAGGG
AATATTCCCCGTGGCCTGTAGCGACGGCTATGGTGGCCTGGTGACCACGGACCCGAAGACGGCTGACCCC
GTTTATGGGAAAGTGTTCAACCCCCCCCGCAACCAGTTGCCGGGGCGTTTTACCAACCTCCTTGATGTGG
CTGAGGCATGCCCGACGTTTCTGCACTTCGAGGGTGGCGTACCGTACGTGACCACGAAAACAGACTCGGA
CAGGGTGCTTGCTCAGTTTGATATGTCTTTGGCAGCAAAACACATGTCAAACACCTTCCTCGCAGGTCTT
GCGCAGTACTACACACAGTACAGTGGCACCATCAACCTGCACTTCATGTTCACAGGACCCACTGACGCGA
AGGCGCGTTACATGATTGCCTACGCCCCACCGGGCATGGAGCCGCCCAAGACACCTGAGGCGGCCGCGCA
CTGCATTCATGCTGAATGGGACACTGGGTTGAACTCAAAGTTTACTTTTTCCATCCCCTACCTCTCGGCC
GCCGATTACGCGTACACCGCGTCTGACGTGGCCGAGACCACAAATGTGCAGGGATGGGTCTGCTTGTTTC
AAATTACACATGGCAAGGCCGACGGCGACGCTCTGGTCGTACTGGCTAGTGCTGGTAAAGACTTTGAGCT
AAGGCTGCCGGTGGACGCCCGTGCGGAAACCACTTCTGCGGGCGAGTCAGCGGATCCTGTCACCACCACT
GTTGAAAACTACGGTGGCGAAACACAGATCCAGAGGCGCCAACACACGGACGTCTCGTTCATTATGGACA
GATTTGTGAAAGTGACACCGCAAAACCAAATTAACATTTTGGACCTCATGCAGGTCCCATCACACACTTT
GGTGGGAGCGCTCCTACGCGCGTCCACTTACTACTTCTCTGACTTGGAGATAGCAGTAAAACACGAGGGA
GACCTCACCTGGGTTCCAAATGGAGCGCCTGAAAAGGCGTTGGACAACACCACCAACCCAACTGCTTACC
ACAAGGCACCACTCACCCGGCTTGCCCTGCCCTACACTGCGCCCCACCGCGTGTTGGCAACCGTGTACAA
CGGTGAGTGCAGGTACAGCAGAAATGCTGTGCCCAACTTGAGAGGTGACCTTCAAGTGTTGGCTCAAAAG
GTGGCACGGACGCTGCCTACCTCCTTCAACTACGGTGCCATCAAAGCGACCCGGGTCACCGAGTTGCTTT
ACCGGATGAAGAGGGCCGAAACATACTGTCCAAGGCCCTTGCTGGCAATCCACCCAACTGAAGCCAGACA
CAAACAGAAAATTGTGGCACCGGTGAAACAGACTTTGAATTTTGACCTTCTGAAGTTGGCAGGAGACGTT
GAGTCCAACCCTGGGCCCTTCTTCTTCTCCGACGTTAGGTCGAACTTCTCCAAACTGGTGGAAACTATCA
ACCAGATGCAGGAGGACATGTCAACAAAACACGGGCCTGACTTTAACCGGTTAGTGTCCGCATTTGAGGA
ATTGGCCATTGGAGTGAAAGCCATCAGAACCGGTCTCGACGAGGCCAAACCCTGGTACAAGCTTATCAAG
CTCCTAAGCCGCCTGTCGTGCATGGCCGCTGTGGCAGCACGGTCCAAGGACCCAGTCCTTGTGGCCATCA
TGCTGGCCGACACCGGTCTCGAGATTCTGGACAGCACCTTCGTCGTGAAGAAGATCTCCGACTCGCTCTC
CAGTCTCTTTCACGTGCCGGCCCCCGTCTTCAGTTTCGGAGCACCGGTCCTGTTGGCCGGGTTGGTCAAA
GTCGCCTCGAGTTTCTTCCGGTCTACACCCGAAGACCTTGAGAGAGCAGAGAAACAGCTCAAAGCACGTG
ACATCAACGACATCTTCGCCATTCTCAAGAACGGCGAGTGGCTGGTCAAACTGATCCTTGCCATCCGCGA
CTGGATTAAGGCTTGGATCGCCTCAGAAGAGAAGTTTGTCACCATGACAGACTTGGTGCCTGGCATCCTT
GAAAAGCAGCGGGATCTGAACGACCCGAGCAAGTACAAGGAAGCCAAGGAGTGGCTCGACAACGCGCGCC
AGGCGTGTTTGAAGAGCGGGAACGTCCACATTGCCAACCTGTGTAAAGTGGTCGCTCCAGCACCCAGCAA
GTCGAGGCCCGAACCCGTGGTTGTTTGTCTCCGCGGCAAATCTGGCCAGGGCAAGAGCTTCCTTGCAAAC
GTGCTTGCACAGGCAATTTCCGCCCACTTCACCGGCAGAACCGACTCAGTGTGGTACTGCCCACCTGACC
CTGACCACTTCGACGGTTACAACCAGCAAACCGTCGTTGTGATGGATGATTTGGGCCAGAACCCTGACGG
CAAGGACTTCAAATACTTTGCCCAAATGGTCTCGACCACAGGGTTCATCCCGCCCATGGCATCACTCGAG
GACAAAGGTAAACCTTTCAACAGCAAAGTCATCATCGCGACCACCAACTTGTACTCGGGCTTCACCCCGA
GGACTATGGTGTGTCCCGACGCACTGAACCGGAGGTTTCACTTTGACATCGATGTGAGTGCTAAGGATGG
GTACAAAATTAACAACAAATTGGACATTATCAAAGCACTTGAAGACACCCACACCAACCCAGTGGCAATG
TTTCAATACGACTGTGCCCTTCTCAACGGCATGGCCGTTGAAATGAAGAGAATGCAACAAGACATGTTCA
AGCCTCAACCACCCCTCCAGAATGTGTACCAGCTTGTTCAGGAGGTGATTGATCGGGTCGAGCTCCATGA
GAAAGTGTCGAGCCACCCGATCTTCAAGCAGATCTCAATTCCTTCCCAAAAATCTGTGTTGTACTTTCTC
ATTGAGAAGGGCCAACATGAGGCAGCAATTGAATTCTTTGAGGGCATGGTCCACGACTCTATTAAGGAGG
AACTCCAACCCCTCCTCCAACAAACTTCATTTGTGAAACGCGCTTTCAAGCGCCTGAAGGAAAATTTTGA
GATTGTTGCTCTGTGTTTAACACTTTTGGCAAACATTGTGATCATGGTCCGTGAGACTCGCAAGAGGCAG
AAAATGGTGGATGATGCAGTGAATGAGTACATTGAGAGAGCAAACATCACCACAGATGACAAGACTCTTG
ACGAGGCGGAGAAGAGCCCTCTAGAGACCAGCGGCGCCAGCACCGTTGGCTTTAGAGAGAGAACTCTCCC
AGGTCAAAAGGCATGCGATGACGTGAACTCCGAGCCTGCCCAACCTGTTGGGGAGCAACCACAAGCTGAA
GGACCCTACGCCGGACCACTCGAGCGTCAGAAACCTCTGAAAGTGAGAGCCAAGCTCCCACAGCAGGAGG
GGCCTTACGCTGGTCCAATGGAGAGACAGAAACCGCTAAAAGTGAAAGCAAAAGCCCCGGTCGTGAAGGA
AGGACCTTACGAGGGACCGGTGAAGAAGCCTGTCGCTTTGAAAGTGAAAGCTAAGAACCTGATTGTCACT
GAGAGTGGTGCCCCACCGACCGACTTGCAAAAGATGGTCATGGGCAACACAAAGCCTGTTGAGCTCATCC
TCGACGGGAAGACAGTAGCCATTTGCTGCGCTACTGGAGTGTTTGGCACTGCTTACCTCGTGCCTCGCCA
CCTCTTCGCAGAGAAGTATGACAAGATCATGTTGGACGGCAGAGCCATGACAGACAGTGACTACAGAGTG
TTTGAGTTTGAGATCAAAGTAAAAGGACAGGACATGCTCTCAGACGCCGCGCTCATGGTGCTCCACCGTG
GGAACCGCGTGAGGGACATCACGAAGCACTTTCGTGACACAGCAAGAATGAAGAAAGGCACCCCCGTTGT
CGGTGTGATTAACAACGCCGATGTCGGGAGACTGATTTTCTCCGGTGAGGCCCTTACTTACAAGGACATT
GTGGTTTGTATGGACGGAGACACCATGCCCGGCCTCTTTGCCTACAGAGCCGCCACCAAGGCTGGCTACT
GCGGAGGAGCCGTTCTCGCCAAAGACGGAGCTGACACTTTCATCGTCGGCACTCACTCTGCAGGAGGCAA
CGGAGTTGGATACTGCTCATGCGTTTCCAGGTCCATGCTTCTTAAAATGAAGGCACACATTGACCCCGAA
CCACACCACGAGGGGTTGATTGTGGACACCAGAGATGTGGAAGAGCGCGTTCACGTGATGCGCAAAACCA
AGCTTGCACCCACCGTTGCACACGGTGTGTTCAACCCCGAGTTTGGGCCCGCTGCCTTGTCCAACAAGGA
CCCGCGTCTGAACGAGGGTGTTGTCCTCGATGAAGTCATCTTCTCCAAACACAAGGGAGACACAAAGATG
TCTGAGGAGGACAAAGCGCTGTTCCGCCGCTGTGCTGCTGACTACGCGTCACGCCTGCACAGCGTGTTGG
GCACAGCAAATGCCCCATTGAGCATCTACGAGGCAATCAAGGGTGTCGACGGACTCGACGCCATGGAACC
AGATACAGCGCCCGGCCTCCCCTGGGCCCTCCAGGGTAAACGCCGCGGCGCGCTCATCGACTTCGAAAAC
GGCACGGTCGGACCCGAAGTCGAGGCTGCCCTGAAGCTCATGGAGAAGAGAGAATACAAATTTGCTTGTC
AGACTTTCCTGAAGGACGAGATTCGCCCGATGGAGAAAGTACGTGCCGGCAAGACTCGCATTGTCGACGT
CTTGCCCGTTGAGCATATTCTTTACACCAGGATGATGATTGGCAGATTTTGTGCACAGATGCACTCAAAC
AACGGACCGCAAATTGGCTCAGCGGTCGGTTGCAACCCTGATGTTGATTGGCAGAGATTTGGCACACACT
TCGCCCAGTACAGAAACGTGTGGGATGTGGACTATTCGGCCTTTGATGCTAATCACTGCAGTGATGCCAT
GAACATCATGTTTGAGGAGGTGTTTCGCACGGAGTTCGGCTTCCACCCGAATGCCGAGTGGATCCTGAAG
ACTCTTGTGAACACGGAACACGCCTATGAGAACAAACGCATCACTGTTGAAGGCGGAATGCCGTCTGGTT
GTTCCGCAACAAGCATCATCAACACAATTTTGAACAACATCTACGTGCTCTACGCCCTGCGTAGACACTA
TGAGGGAGTTGAGCTGGACACATACACCATGATCTCCTACGGAGACGACATCGTGGTGGCAAGTGATTAT
GACTTGGACTTTGAGGCTCTCAAGCCCCACTTCAAATCCCTTGGTCAAACCATCACTCCAGCTGACAAAA
GCGACAAAGGTTTTGTTCTTGGTCACTCCATTACCGATGTCACTTTCCTCAAAAGACACTTCCACATGGA
CTATGGAACTGGGTTTTACAAACCTGTGATGGCCTCAAAGACCCTTGAGGCTATCCTCTCCTTTGCACGC
CGTGGGACCATACAGGAGAAGTTGATCTCCGTGGCAGGACTCGCCGTCCACTCTGGACCAGACGAGTACC
GGCGTCTCTTTGAGCCTTTCCAAGGTCTCTTTGAGATTCCAAGCTACAGATCACTTTACCTGCGTTGGGT
GAACGCCGTGTGTGGTGACGCATAATCCCTCAGAGGCCACGACAACCGGGCTCTGAGGCGCGCGACACCT
TAGGAGTGAAAGCCTGAAAGGGCTTTTCCCGCTTCCTTAATCTAAAAAAAAAAAAA
>IP7
GGTCTCACCCCTAGTAAGCCAACGACAGTCCCTGCGTTGCACTCCACACTTACGTTGTACACACGCGGGA
CCCGATGGACTTTCGTTCACCCACCTACAGCTGGACTCACGGCACCGCGTGGCCATTTTAGCTGGATTGT
GCGGACGAACACTGCTTGCGCACCTCGCGTGACCAGTTAGTACTCTTACCACTCTCCGCCTACTTGGTCG
TTAGCGCTGTCTTGGGCACTCCTGTTGGGGGCCGCTCGACGCTCCACGGGCTCTCCTGTGTGACATCTAC
GGTGATGGGGCCGTTTCGCGCGTGCTGGTCGTCTGGACTGCTTCGGCTGTCACCCGACGCCCGCCNNNNN
CCCCCCCCCCCCNNNNNTTTACCGTCGTTCCCGACGTAAAAGGGAGGTAACCACAAGCTTGAAACCGTCC
AGCCCGACGAAAAAGGGTGGTAACCACAAGCTTACTGCCGTCTTTCCCGACGTTAAAGGGATGAAACCAC
AAGACTTACCTTCGCTCGGAAGTAAAACGACAAACACGCACAGTTTTGCCCGTTTTCATGAGAAATGGGA
CGTCTGCGCACGAAACGCGCCGTCGCTTGAGGAGGACTTGTACAAACACGATCTATGCAGGTTTCCCCAA
CTGACACAAACCGTGCAACTTGAAACTCCGCCTGGTCTTTCCAGGTCTAGAGGGGTAACATTTTGTACTG
TGTTTGACTCCACGCTCGATCCACTAGCGAGTGTTAGTAGCGGTACTGCTGTCTCGTAGCGGAGCATGTT
GGCCGTGGGAACACCTCCTTGGTAACAAGGACCCACGGGGCCGAAAGCCACGTCCTAACGGACCCAACAT
GTGTGCAACCCCAGCACGGCAGCTTTACTGTGAAACCCACTTCAAGGTGACATTGTTACTGGTACTCAAA
CACTGGTGACAGGCTAAGGATGCCCTTCAGGTACCCCGAGGTAACAAGCGACACTCGGGATCTGAGAAGG
GGACTGGGACTTCTTTAAAGTGCCCAGTTTAAAAAGCTTCTACGCCTGAATAGGTGACCGGAGGCCGGCA
CCTTTCCTTTTATAAACACTGAACACATGAATACAACTGACTGTTTTATCGCTTTGGTACAGGCTATCAG
AGAGATTAAAGCACTTTTCCTACCACGCACCACAGGAAAAATGGAACTGACACTGTACAACGGTGAGAAG
AAGACCTTTTACTCCAGGCCCAACAACCACGACAACTGCTGGTTGAACGCCATCCTCCAGTTGTTCAGGT
ACGTTGAAGAACCATTCTTCGACTGGGTCTACAGTTCGCCTGAGAACCTCACGCTTGAAGCCATCAAGCA
GTTGGAGGACCTCACAGGGCTTGAACTGCACGAGGGTGGACCACCTGCTCTCGTGATCTGGAACATCAAG
CACTTGCTCCACACCGGCATTGGCACCGCCTCGCGACCCAGCGAGGTGTGCATGGTGGATGGTACGGACA
TGTGCTTGGCTGATTTCCATGCAGGCATTTTCCTTAAGGGGCAAGAACACGCTGTGTTCGCGTGTGTCAC
CTCCAACGGGTGGTACGCGATTGATGATGAGGACTTCTACCCCTGGACGCCGGACCCATCCGACGTTCTG
GTGTTTGTCCCGTACGATCAAGAACCACTCAACGGGGAATGGAAAGCCAAGGTTCAACGCAAGCTCAAAG
GGGCTGGACAATCCAGTCCAGCGACCGGCTCGCAGAACCAATCTGGCAATACTGGCAGCATAATAAACAA
CTACTACATGCAGCAGTATCAAAACTCCATGGACACACAGCTTGGTGACAACGCAATCAGTGGAGGCTCT
AACGAGGGCTCCACCGACACAACCTCCACCCACACAACCAACACCCAGAACAATGACTGGTTCTCCAAAC
TTGCAAGCTCTGCTTTCAGCGGTCTTTTCGGCGCTCTTCTCGCCGACAAGAAGACAGAGGAGACCACTCT
CCTCGAAGACCGCATCCTCACCACCCGTAACGGCCACACCACGTCGACAACCCAGTCAAGCGTTGGAGTC
ACATACGGGTACGCAACAGCTGAGGATTTTGTGAGCGGACCGAACACTTCTGGTCTCGAGACCAGAGTTG
TGCAGGCAGAACGGTTTTTCAAAACCCACCTCTTCGACTGGGTCACCAGTGACTCATTCGGACGTTGCCA
CCTCCTGGAACTCCCGACCGACCACAAAGGTGTCTACGGCAGCCTGACCGACTCGTATGCATATATGAGG
AACGGCTGGGATGTCGAGGTCACCGCGGTTGGCAACCAGTTCAACGGAGGGTGCCTGCTGGTCGCAATGG
TACCAGAGCTTTGTTCTATCCAAAAGAGGGAACTGTACCAGCTCACACTCTTCCCTCACCAGTTCATCAA
CCCACGCACGAACATGACTGCGCACATTACAGTGCCCTTTGTTGGCGTTAACCGCTACGACCAGTACAAG
GTTCACAAGCCTTGGACCCTTGTGGTTATGGTTGTAGCCCCTCTGACCGTCAACACTGAAGGTGCCCCTC
AGATCAAGGTGTATGCCAACATTGCCCCAACTAACGTGCACGTCGCGGGTGAGTTTCCTTCCAAAGAGGG
AATATTCCCCGTGGCCTGTAGCGACGGCTATGGTGGCCTGGTGACCACGGACCCGAAGACGGCTGACCCC
GTTTATGGGAAAGTGTTCAACCCCCCCCGCAACCAGTTGCCGGGGCGTTTTACCAACCTCCTTGATGTGG
CTGAGGCATGCCCGACGTTTCTGCACTTCGAGGGTGGCGTACCGTACGTGACCACGAAAACAGACTCGGA
CAGGGTGCTTGCTCAGTTTGATATGTCTTTGGCAGCAAAACACATGTCAAACACCTTCCTCGCAGGTCTT
GCGCAGTACTACACACAGTACAGTGGCACCATCAACCTGCACTTCATGTTCACAGGACCCACTGACGCGA
AGGCGCGTTACATGATTGCCTACGCCCCACCGGGCATGGAGCCGCCCAAGACACCTGAGGCGGCCGCGCA
CTGCATTCATGCTGAATGGGACACTGGGTTGAACTCAAAGTTTACTTTTTCCATCCCCTACCTCTCGGCC
GCCGATTACGCGTACACCGCGTCTGACGTGGCCGAGACCACAAATGTGCAGGGATGGGTCTGCTTGTTTC
AAATTACACATGGCAAGGCCGACGGCGACGCTCTGGTCGTACTGGCTAGTGCTGGTAAAGACTTTGAGCT
AAGGCTGCCGGTGGACGCCCGTGCGGAAACCACTTCTGCGGGCGAGTCAGCGGATCCTGTCACCACCACT
GTTGAAAACTACGGTGGCGAAACACAGATCCAGAGGCGCCAACACACGGACGTCTCGTTCATTATGGACA
GATTTGTGAAAGTGACACCGCAAAACCAAATTAACATTTTGGACCTCATGCAGGTCCCATCACACACTTT
GGTGGGAGCGCTCCTACGCGCGTCCACTTACTACTTCTCTGACTTGGAGATAGCAGTAAAACACGAGGGA
GACCTCACCTGGGTTCCAAATGGAGCGCCTGAAAAGGCGTTGGACAACACCACCAACCCAACTGCTTACC
ACAAGGCACCACTCACCCGGCTTGCCCTGCCCTACACTGCGCCCCACCGCGTGTTGGCAACCGTGTACAA
CGGTGAGTGCAGGTACAGCAGAAATGCTGTGCCCAACTTGAGAGGTGACCTTCAAGTGTTGGCTCAAAAG
GTGGCACGGACGCTGCCTACCTCCTTCAACTACGGTGCCATCAAAGCGACCCGGGTCACCGAGTTGCTTT
ACCGGATGAAGAGGGCCGAAACATACTGTCCAAGGCCCTTGCTGGCAATCCACCCAACTGAAGCCAGACA
CAAACAGAAAATTGTGGCACCGGTGAAACAGACTTTGAATTTTGACCTTCTGAAGTTGGCAGGAGACGTT
GAGTCCAACCCTGGGCCCTTCTTCTTCTCCGACGTTAGGTCGAACTTCTCCAAACTAGTGGAAACTATCA
ACCAGATGCAGGAGGACATGTCAACAAAACACGGGCCTGACTTTAACCGGTTAGTGTCCGCATTTGAGGA
ATTGGCCATTGGAGTGAAAGCCATCAGAACCGGTCTCGACGAGGCCAAACCCTGGTACAAGCTTATCAAG
CTCCTAAGCCGCCTGTCGTGCATGGCCGCTGTGGCAGCACGGTCCAAGGACCCAGTCCTTGTGGCCATCA
TGCTGGCCGACACCGGTCTCGAGATTCTGGACAGCACCTTCGTCGTGAAGAAGATCTCCGACTCGCTCTC
CAGTCTCTTTCACGTGCCGGCCCCCGTCTTCAGTTTCGGAGCACCGGTCCTGTTGGCCGGGTTGGTCAAA
GTCGCCTCGAGTTTCTTCCGGTCTACACCCGAAGACCTTGAGAGAGCAGAGAAACAGCTCAAAGCACGTG
ACATCAACGACATCTTCGCCATTCTCAAGAACGGCGAGTGGCTGGTCAAACTGATCCTTGCCATCCGCGA
CTGGATTAAGGCTTGGATCGCCTCAGAAGAGAAGTTTGTCACCATGACAGACTTGGTGCCTGGCATCCTT
GAAAAGCAGCGGGATCTGAACGACCCGAGCAAGTACAAGGAAGCCAAGGAGTGGCTCGACAACGCGCGCC
AGGCGTGTTTGAAGAGCGGGAACGTCCACATTGCCAACCTGTGTAAAGTGGTCGCTCCAGCACCCAGCAA
GTCGAGGCCCGAACCCGTGGTTGTTTGTCTCCGCGGCAAATCTGGCCAGGGCAAGAGCTTCCTTGCAAAC
GTGCTTGCACAGGCAATTTCCGCCCACTTCACCGGCAGAACCGACTCAGTGTGGTACTGCCCACCTGACC
CTGACCACTTCGACGGTTACAACCAGCAAACCGTCGTTGTGATGGATGATTTGGGCCAGAACCCTGACGG
CAAGGACTTCAAATACTTTGCCCAAATGGTCTCGACCACAGGGTTCATCCCGCCCATGGCATCACTCGAG
GACAAAGGTAAACCTTTCAACAGCAAAGTCATCATCGCGACCACCAACTTGTACTCGGGCTTCACCCCGA
GGACTATGGTGTGTCCCGACGCACTGAACCGGAGGTTTCACTTTGACATCGATGTGAGTGCTAAGGATGG
GTACAAAATTAACAACAAATTGGACATTATCAAAGCACTTGAAGACACCCACACCAACCCAGTGGCAATG
TTTCAATACGACTGTGCCCTTCTCAACGGCATGGCCGTTGAAATGAAGAGAATGCAACAAGACATGTTCA
AGCCTCAACCACCCCTCCAGAATGTGTACCAGCTTGTTCAGGAGGTGATTGATCGGGTCGAGCTCCATGA
GAAAGTGTCGAGCCACCCGATCTTCAAGCAGATCTCAATTCCTTCCCAAAAATCTGTGTTGTACTTTCTC
ATTGAGAAGGGCCAACATGAGGCAGCAATTGAATTCTTTGAGGGCATGGTCCACAACTCTATTAAGGAGG
AACTCCAACCCCTCCTCCAACAAACTTCATTTGTGAAACGCGCTTTCAAGCGCCTGAAGGAAAATTTTGA
GATTGTTGCTCTGTGTTTAACACTTTTGGCAAACATTGTGATCATGGTCCGTGAGACTCGCAAGAGGCAG
AAAATGGTGGATGATGCAGTGAATGAGTACATTGAGAAAGCAAACATCACCACAGATGACAAGACTCTTG
ACGAGGCGGAGAAGAGCCCTCTAGAGACCAGCGGCGCCAGCACCGTTGGCTTTAGAGAGAGAACTCTCCC
AGGTCAAAAGGCATGCGATGACGTGAACTCCGAGCCTGCCCAACCTGTTGAGGAGCAACCACAAGCTGAA
GGACCCTACGCCGGACCACTCGAGCGTCAGAAACCTCTGAAAGTGAGAGCCAAGCTCCCACAGCAGGAGG
GGCCTTACGCTGGTCCAATGGAGAGACAGAAACCGCTAAAAGTGAAAGCAAAAGCCCCGGTCGTGAAGGA
AGGACCTTACGAGGGACCGGTGAAGAAGCCTGTCGCTTTGAAAGTGAAAGCTAAGAACCTGATTGTCACT
GAGAGTGGTGCCCCACCGACCGACTTGCAAAAGATGGTCATGGGCAACACAAAGCCTGTTGAGCTCATCC
TCGACGGGAAGACAGTAGCCATTTGCTGCGCTACTGGAGTGTTTGGCACTGCTTACCTCGTGCCTCGCCA
CCTCTTCGCAGAGAAGTATGACAAGATCATGTTGGACGGCAGAGCCATGACAGACAGTGACTACAGAGTG
TTTGAGTTTGAGATCAAAGTAAAAGGACAGGACATGCTCTCAGACGCCGCGCTCATGGTGCTCCACCGTG
GGAACCGCGTGAGGGACATCACGAAGCACTTTCGTGACACAGCAAGAATGAAGAAAGGCACCCCCGTTGT
CGGTGTGATTAACAACGCCGATGTCGGGAGACTGATTTTCTCCGGTGAGGCCCTTACTTACAAGGACATT
GTGGTTTGTATGGACGGAGACACCATGCCCGGCCTCTTTGCCTACAGAGCCGCCACCAAGGCTGGCTACT
GCGGAGGAGCCGTTCTCGCCAAAGACGGAGCTGACACTTTCATCGTCGGCACTCACTCTGCAGGAGGCAA
CGGAGTTGGATACTGCTCATGCGTTTCCAGGTCCATGCTTCTTAAAATGAAGGCACACATTGACCCCGAA
CCACACCACGAGGGGTTGATTGTGGACACCAGAGATGTGGAAGAGCGCGTTCACGTGATGCGCAAAACCA
AGCTTGCACCCACCGTTGCACACGGTGTGTTCAACCCCGAGTTTGGGCCCGCTGCCTTGTCCAACAAGGA
CCCGCGTCTGAACGAGGGTGTTGTCCTCGATGAAGTCATCTTCTCCAAACACAAGGGAGACACAAAGATG
TCTGAGGAGGACAAAGCGCTGTTCCGCCGCTGTGCTGCTGACTACGCGTCACGCCTGCACAGCGTGTTGG
GCACAGCAAATGCCCCATTGAGCATCTACGAGGCAATCAAGGGTGTCGACGGACTCGACGCCATGGAACC
AGATACAGCGCCCGGCCTCCCCTGGGCCCTCCAGGGTAAACGCCGCGGCGCGCTCATCGACTTCGAAAAC
GGCACGGTCGGACCCGAAGTCGAGGCTGCCCTGAAGCTCATGGAGAAGAGAGAATACAAATTTGCTTGTC
AGACTTTCCTGAAGGACGAGATTCGCCCGATGGAGAAAGTACGTGCCGGCAAGACTCGCATTGTCGACGT
CTTGCCCGTTGAGCATATTCTTTACACCAGGATGATGATTGGCAGATTTTGTGCACAGATGCACTCAAAC
AACGGACCGCAAATTGGCTCAGCGGTCGGTTGCAACCCTGATGTTGATTGGCAGAGATTTGGCACACACT
TCGCCCAGTACAGAAACGTGTGGGATGTGGACTATTCGGCCTTTGATGCTAATCACTGCAGTGATGCCAT
GAACATCATGTTTGAGGAGGTGTTTCGCACGGAGTTCGGCTTCCACCCGAATGCCGAGTGGATCCTGAAG
ACTCTTGTGAACACGGAACACGCCTATGAGAACAAACGCATCACTGTTGAAGGCGGAATGCCGTCTGGTT
GTTCCGCAACAAGCATCATCAACACAATTTTGAACAACATCTACGTGCTCTACGCCCTGCGTAGACACTA
TGAGGGAGTTGAGCTGGACACATACACCATGATCTCCTACGGAGACGACATCGTGGTGGCAAGTGATTAT
GACTTGGACTTTGAGGCTCTCAAGCCCCACTTCAAATCCCTTGGTCAAACCATCACTCCAGCTGACAAAA
GCGACAAAGGTTTTGTTCTTGGTCACTCCATTACCGATGTCACTTTCCTCAAAAGACACTTCCACATGGA
CTATGGAACTGGGTTTTACAAACCTGTGATGGCCTCAAAGACCCTTGAGGCTATCCTCTCCTTTGCACGC
CGTGGGACCATACAGGAGAAGTTGATCTCCGTGGCAGGACTCGCCGTCCACTCTGGACCAGACGAGTACC
GGCGTCTCTTTGAGCCTTTCCAAGGTCTCTTTGAGATTCCAAGCTACAGATCACTTTACCTGCGTTGGGT
GAACGCCGTGTGTGGTGACGCATAATCCCTCAGAGGCCACGACAACCGGGCTCTGAGGCGCGCGACACCT
TAGGAGTGAAAGCCTGAAAGGGCTTTTCCCGCTTCCTTAATCTAAAAAAAAAAAAA
>IP8
GGTCTCACCCCTAGTAAGCCAACGACAGTCCCTGCGTTGCACTCCACACTTACGTTGTACACACGCGGGA
CCCGATGGACTTTCGTTCACCCACCTACAGCTGGACTCACGGCACCGCGTGGCCATTTTAGCTGGATTGT
GAGGACGAACACTGCTTGCGCACCTCGCGTGACCAGTTAGTACTCTTACCACTCTCCGCCTACTTGGTCG
TTAGCGCTGTCTTGGGCACTCCTGTTGGGGGCCGTTCGACGCTCCACGGGCTCTCCTGTGTGACATCTAC
GGTGATGGGGCCGTTTCGCGCGTGCTGGTCGTCTGGACTGCTTCGGCTGTCACCCGACGCCCGCCNNNNN
CCCCCCCCCCCCNNNNNTTTACCGTCGTTCCCGACGTAAAAGGGAGGTAACCACAAGCTTGAAACCGTCC
AGCCCGACGAAAAAGGGTGGTAACCACAAGCTTACTGCCGTCTTTCCCGACGTTAAAGGGATGAAACCAC
AAGACTTACCTTCGCTCGGAAGTAAAACGACAAACACGCACAGTTTTGCCCGTTTTCATGAGAAATGGGA
CGTCTGCGCACGAAACGCGCCGTCGCTTGAGGAGGACTTGTACAAACACGATCTATGCAGGTTTCCCCAA
CTGACACAAACCGTGCAACTTGAAACTCCGCCTGGTCTTTCCAGGTCTAGAGGGGTAACATTTTGTACTG
TGTTTGACTCCACGCTCGATCCACTAGCGAGTGTTAGTAGCGGTACTGCTGTCTCGTAGCGGAGCATGTT
GGCCGTGGGAACACCTCCTTGGTAACAAGGACCCACGGGGCCGAAAGCCACGTCCTAACGGACCCAACAT
GTGTGCAACCCCAGCACGGCAGCTTTACTGTGAAACCCACTTCAAGGTGACATTGTTACTGGTACTCAAA
CACTGGTGACAGGCTAAGGATGCCCTTCAGGTACCCCGAGGTAACAAGCGACACTCGGGATCTGAGAAGG
GGACTGGGACTTCTTTAAAGTGCCCAGTTTAAAAAGCTTCTACGCCTGAATAGGTGACCGGAGGCCGGCA
CCTTTCCTTTTATAAACACTGAACACATGAATACAACTGACTGTTTTATCGCTTTGGTACAGGCTATCAG
AGAGATTAAAGCACTTTTCCTACCACGCACCACAGGAAAAATGGAACTGACACTGTACAACGGTGAGAAG
AAGACCTTTTACTCCAGGCCCAACAACCACGACAACTGCTGGTTGAACGCCATCCTCCAGTTGTTCAGGT
ACGTTGAAGAACCATTCTTCGACTGGGTCTACAGTTCGCCTGAGAACCTCACGCTTGAAGCCATCAAGCA
GTTGGAGGACCTCACAGGGCTTGAACTGCACGAGGGTGGACCACCTGCTCTCGTGATCTGGAACATCAAG
CACTTGCTCCACACCGGCATTGGCACCGCCTCGCGACCCAGCGAGGTGTGCATGGTGGATGGTACGGACA
TGTGCTTGGCTGATTTCCATGCAGGCATTTTCCTTAAGGGGCAAGAACACGCTGTGTTCGCGTGTGTCAC
CTCCAACGGGTGGTACGCGATTGATGATGAGGACTTCTACCCCTGGACGCCGGACCCATCCGACGTTCTG
GTGTTTGTCCCGTACGATCAAGAACCACTCAACGGGGAATGGAAAGCCAAGGTTCAACGCAAGCTCAAAG
GGGCTGGACAATCCAGTCCAGCGACCGGCTCGCAGAACCAATCTGGCAATACTGGCAGCATAATAAACAA
CTACTACATGCAGCAGTATCAAAACTCCATGGACACACAGCTTGGTGACAACGCAATCAGTGGAGGCTCT
AACGAGGGCTCCACCGACACAACCTCCACCCACACAACCAACACCCAGAACAATGACTGGTTCTCCAAAC
TTGCAAGCTCTGCTTTCAGCGGTCTTTTCGGCGCTCTTCTCGCCGACAAGAAGACAGAGGAGACCACTCT
CCTCGAAGACCGCATCCTCACCACCCGTAACGGCCACACCACGTCGACAACCCAGTCAAGCGTTGGAGTC
ACATACGGGTACGCAACAGCTGAGGATTTTGTGAGCGGACCGAACACTTCTGGTCTCGAGACCAGAGTTG
TGCAGGCAGAACGGTTTTTCAAAACCCACCTCTTCGACTGGGTCACCAGTGACTCATTCGGACGTTGCCA
CCTCCTGGAACTCCCGACCGACCACAAAGGTGTCTACGGCAGCCTGACCGACTCGTATGCATATATGAGG
AACGGCTGGGATGTCGAGGTCACCGCGGTTGGCAACCAGTTCAACGGAGGGTGCCTGCTGGTCGCAATGG
TACCAGAGCTTTGTTCTATCCAAAAGAGGGAACTGTACCAGCTCACACTCTTCCCTCACCAGTTCATCAA
CCCACGCACGAACATGACTGCGCACATTACAGTGCCCTTTGTTGGCGTTAACCGCTACGACCAGTACAAG
GTTCACAAGCCTTGGACCCTTGTGGTTATGGTTGTAGCCCCTCTGACCGTCAACACTGAAGGTGCCCCTC
AGATCAAGGTGTATGCCAACATTGCCCCAACTAACGTGCACGTCGCGGGTGAGTTTCCTTCCAAAGAGGG
AATATTCCCCGTGGCCTGTAGCGACGGCTATGGTGGCCTGGTGACCACGGACCCGAAGACGGCTGACCCC
GTTTATGGGAAAGTGTTCAACCCCCCCCGCAACCAGTTGCCGGGGCGTTTTACCAACCTCCTTGATGTGG
CTGAGGCATGCCCGACGTTTCTGCACTTCGAGGGTGGCGTACCGTACGTGACCACGAAAACAGACTCGGA
CAGGGTGCTTGCTCAGTTTGATATGTCTTTGGCAGCAAAACACATGTCAAACACCTTCCTCGCAGGTCTT
GCGCAGTACTACACACAGTACAGTGGCACCATCAACCTGCACTTCATGTTCACAGGACCCACTGACGCGA
AGGCGCGTTACATGATTGCCTACGCCCCACCGGGCATGGAGCCGCCCAAGACACCTGAGGCGGCCGCGCA
CTGCATTCATGCTGAATGGGACACTGGGTTGAACTCAAAGTTTACTTTTTCCATCCCCTACCTCTCGGCC
GCCGATTACGCGTACACCGCGTCTGACGTGGCCGAGACCACAAATGTGCAGGGATGGGTCTGCTTGTTTC
AAATTACACATGGCAAGGCCGACGGCGACGCTCTGGTCGTACTGGCTAGTGCTGGTAAAGACTTTGAGCT
AAGGCTGCCGGTGGACGCCCGTGCGGAAACCACTTCTGCGGGCGAGTCAGCGGATCCTGTCACCACCACT
GTTGAAAACTACGGTGGCGAAACACAGATCCAGAGGCGCCAACACACGGACGTCTCGTTCATTATGGACA
GATTTGTGAAAGTGACACCGCAAAACCAAATTAACATTTTGGACCTCATGCAGGTCCCATCACACACTTT
GGTGGGAGCGCTCCTACGCGCGTCCACTTACTACTTCTCTGACTTGGAGATAGCAGTAAAACACGAGGGA
GACCTCACCTGGGTTCCAAATGGAGCGCCTGAAAAGGCGTTGGACAACACCACCAACCCAACTGCTTACC
ACAAGGCACCACTCACCCGGCTTGCCCTGCCCTACACTGCGCCCCACCGCGTGTTGGCAACCGTGTACAA
CGGTGAGTGCAGGTACAGCAGAAATGCTGTGCCCAACTTGAGAGGTGACCTTCAAGTGTTGGCTCAAAAG
GTGGCACGGACGCTGCCTACCTCCTTCAACTACGGTGCCATCAAAGCGACCCGGGTCACCGAGTTGCTTT
ACCGGATGAAGAGGGCCGAAACATACTGTCCAAGGCCCTTGCTGGCAATCCACCCAACTGAAGCTAGACA
CAAACAGAAAATTGTGGCACCGGTGAAACAGACTTTGAATTTTGACCTTCTGAAGTTGGCAGGAGACGTT
GAGTCCAACCCTGGGCCCTTCTTCTTCTCCGACGTTAGGTCGAACTTCTCCAAACTAGTGGAAACTATCA
ACCAGATGCAGGAGGACATGTCAACAAAACACGGGCCTGACTTTAACCGGTTAGTGTCCGCATTTGAGGA
ATTGGCCATTGGAGTGAAAGCCATCAGAACCGGTCTCGACGAGGCCAAACCCTGGTACAAGCTTATCAAG
CTCCTAAGCCGCCTGTCGTGCATGGCCGCTGTGGCAGCACGGTCCAAGGACCCAGTCCTTGTGGCCATCA
TGCTGGCCGACACCGGTCTCGAGATTCTGGACAGCACCTTCGTCGTGAAGAAGATCTCCGACTCGCTCTC
CAGTCTCTTTCACGTGCCGGCCCCCGTCTTCAGTTTCGGAGCACCGGTCCTGTTGGCCGGGTTGGTCAAA
GTCGCCTCGAGTTTCTTCCGGTCTACACCCGAAGACCTTGAGAGAGCAGGGAAACAGCTCAAAGCACGTG
ACATCAACGACATCTTCGCCATTCTCAAGAACGGCGAGTGGCTGGTCAAACTGATCCTTGCCATCCGCGA
CTGGATTAAGGCTTGGATCGCCTCAGAAGAGAAGTTTGTCACCATGACAGACTTGGTGCCTGGCATCCTT
GAAAAGCAGCGGGATCTGAACGACCCGAGCAAGTACAAGGAAGCCAAGGAGTGGCTCGACAACGCGCGCC
AGGCGTGTTTGAAGAGCGGGAACGTCCACATTGCCAACCTGTGTAAAGTGGTCGCTCCAGCACCCAGCAA
GTCGAGGCCCGAACCCGTGGTTGTTTGTCTCCGCGGCAAATCTGGCCAGGGCAAGAGCTTCCTTGCAAAC
GTGCTTGCACAGGCAATTTCCGCCCACTTCACCGGCAGAACCGACTCAGTGTGGTACTGCCCACCTGACC
CTGACCACTTCGACGGTTACAACCAGCAAACCGTCGTTGTGATGGATGATTTGGGCCAGAACCCTGACGG
CAAGGACTTCAAATACTTTGCCCAAATGGTCTCGACCACAGGGTTCATCCCGCCCATGGCATCACTCGAG
GACAAAGGTAAACCTTTCAACAGCAAAGTCATCATCGCGACCACCAACTTGTACTCGGGCTTCACCCCGA
GGACTATGGTGTGTCCCGACGCACTGAACCGGAGGTTTCACTTTGACATCGATGTGAGTGCTAAGGATGG
GTACAAAATTAACAACAAATTGGACATTATCAAAGCACTTGAAGACACCCACACCAACCCAGTGGCAATG
TTTCAATACGACTGTGCCCTTCTCAACGGCATGGCCGTTGAAATGAAGAGAATGCAACAAGACATGTTCA
AGCCTCAACCACCCCTCCAGAATGTGTACCAGCTTGTTCAGGAGGTGATTGATCGGGTCGAGCTCCATGA
GAAAGTGTCGAGCCACCCGATCTTCAAGCAGATCTCAATTCCTTCCCAAAAATCTGTGTTGTACTTTCTC
ATTGAGAAGGGCCAACATGAGGCAGCAATTGAATTCTTTGAGGGCATGGTCCACAACTCTATTAAGGAGG
AACTCCAACCCCTCCTCCAACAAACTTCATTTGTGAAACGCGCTTTCAAGCGCCTGAAGGAAAATTTTGA
GATTGTTGCTCTGTGTTTAACACTTTTGGCAAACATTGTGATCATGGTCCGTGAGACTCGCAAGAGGCAG
AAAATGGTGGATGATGCAGTGAATGAGTACATTGAGAAAGCAAACATCACCACAGATGACAAGACTCTTG
ACGAGGCGGAGAAGAGCCCTCTAGAGACCAGCGGCGCCAGCACCGTTGGCTTTAGAGAGAGAACTCTCCC
AGGTCAAAAGGCATGCGATGACGTGAACTCCGAGCCTGCCCAACCTGTTGAGGAGCAACCACAAGCTGAA
GGACCCTACGCCGGACCACTCGAGCGTCAGAAACCTCTGAAAGTGAGAGCCAAGCTCCCACAGCAGGAGG
GGCCTTACGCTGGTCCAATGGAGAGACAGAAACCGCTAAAAGTGAAAGCAAAAGCCCCGGTCGTGAAGGA
AGGACCTTACGAGGGACCGGTGAAGAAGCCTGTCGCTTTGAAAGTGAAAGCTAAGAACCTGATTGTCACT
GAGAGTGGTGCCCCACCGACCGACTTGCAAAAGATGGTCATGGGCAACACAAAGCCTGTTGAGCTCATCC
TCGACGGGAAGACAGTAGCCATTTGCTGCGCTACTGGAGTGTTTGGCACTGCTTACCTCGTGCCTCGCCA
CCTCTTCGCAGAGAAGTATGACAAGATCATGTTGGACGGCAGAGCCATGACAGACAGTGACTACAGAGTG
TTTGAGTTTGAGATCAAAGTAAAAGGACAGGACATGCTCTCAGACGCCGCGCTCATGGTGCTCCACCGTG
GGAACCGCGTGAGGGACATCACGAAGCACTTTCGTGACACAGCAAGAATGAAGAAAGGCACCCCCGTTGT
CGGTGTGATTAACAACGCCGATGTCGGGAGACTGATTTTCTCCGGTGAGGCCCTTACTTACAAGGACATT
GTGGTTTGTATGGACGGAGACACCATGCCCGGCCTCTTTGCCTACAGAGCCGCCACCAAGGCTGGCTACT
GCGGAGGAGCCGTTCTCGCCAAAGACGGAGCTGACACTTTCATCGTCGGCACTCACTCTGCAGGAGGCAA
CGGAGTTGGATACTGCTCGTGCGTTTCCAGGTCCATGCTTCTTAAAATGAAGGCACACATTGACCCCGAA
CCACACCACGAGGGGTTGATTGTGGACACCAGAGATGTGGAAGAGCGCGTTCACGTGATGCGCAAAACCA
AGCTTGCACCCACCGTTGCACACGGTGTGTTCAACCCCGAGTTTGGGCCCGCTGCCTTGTCCAACAAGGA
CCCGCGTCTGAACGAGGGTGTTGTCCTCGATGAAGTCATCTTCTCCAAACACAAGGGAGACACAAAGATG
TCTGAGGAGGACAAAGCGCTGTTCCGCCGCTGTGCTGCTGACTACGCGTCACGCCTGCACAGCGTGTTGG
GCACAGCAAATGCCCCATTGAGCATCTACGAGGCAATCAAGGGTGTCGACGGACTCGACGCCATGGAACC
AGATACAGCGCCCGGCCTCCCCTGGGCCCTCCAGGGTAAACGCCGCGGCGCGCTCATCGACTTCGAAAAC
GGCACGGTCGGACCCGAAGTCGAGGCTGCCCTGAAGCTCATGGAGAAGAGAGAATACAAATTTGCTTGTC
AGACTTTCCTGAAGGACGAGATTCGCCCGATGGAGAAAGTACGTGCCGGCAAGACTCGCATTGTCGACGT
CTTGCCCGTTGAGCATATTCTTTACACCAGGATGATGATTGGCAGATTTTGTGCACAGATGCACTCAAAC
AACGGACCGCAAATTGGCTCAGCGGTCGGTTGCAACCCTGATGTTGATTGGCAGAGATTTGGCACACACT
TCGCCCAGTACAGAAACGTGTGGGATGTGGACTATTCGGCCTTTGATGCTAATCACTGCAGTGATGCCAT
GAACATCATGTTTGAGGAGGTGTTTCGCACGGAGTTCGGCTTCCACCCGAATGCCGAGTGGATCCTGAAG
ACTCTTGTGAACACGGAACACGCCTATGAGAACAAACGCATCACTGTTGAAGGCGGAATGCCGTCTGGTT
GTTCCGCAACAAGCATCATCAACACAATTTTGAACAACATCTACGTGCTCTACGCCCTGCGTAGACACTA
TGAGGGAGTTGAGCTGGACACATACACCATGATCTCCTACGGAGACGACATCGTGGTGGCAAGTGATTAT
GACTTGGACTTTGAGGCTCTCAAGCCCCACTTCAAATCCCTTGGTCAAACCATCACTCCAGCTGACAAAA
GCGACAAAGGTTTTGTTCTTGGTCACTCCATTACCGATGTCACTTTCCTCAAAAGACACTTCCACATGGA
CTATGGAACTGGGTTTTACAAACCTGTGATGGCCTCAAAGACCCTTGAGGCTATCCTCTCCTTTGCACGC
CGTGGGACCATACAGGAGAAGTTGATCTCCGTGGCAGGACTCGCCGTCCACTCTGGACCAGACGAGTACC
GGCGTCTCTTTGAGCCTTTCCAAGGTCTCTTTGAGATTCCAAGCTACAGATCACTTTACCTGCGTTGGGT
GAACGCCGTGTGTGGTGACGCATAATCCCTCAGAGGCCACGACAACCGGGCTCTGAGGCGCGCGACACCT
TAGGAGTGAAAGCCTGAAAGGGCTTTTCCCGCTTCCTTAATCTAAAAAAAAAAAAA
