# Supplementary material for: A Bayesian Inference Framework to Reconstruct Transmission Trees Using Epidemiological and Genetic Data
Source: PubMed Central journal article supplement (PMC3499255; doi:10.1371/journal.pcbi.1002768), 2012-11-15
Supplement: pcbi.1002768.s022.pdf [file pcbi.1002768.s022.pdf]

| Coverage             | Test | 2007 | 2001 |
|----------------------|------|------|------|
| Infection times      | 0.78 | 0.81 | 0.88 |
| Infectiousness times | 0.93 | 0.95 | 0.93 |
| Source strength      | 0.97 | 0.55 | 1.00 |
| Dispersion parameter | 0.89 | 0.60 | 1.00 |
| Latency mean         | 0.94 | 0.78 | 1.00 |
| Latency Sd.          | 0.43 | 0.83 | 0.97 |
